# Supplementary material for: Metabolic requirement for GOT2 in pancreatic cancer depends on environmental context
Source: eLife journal article supplement (doi:10.7554/elife.73245), 2022-07-11

**Figure 6-figure supplement 2C**


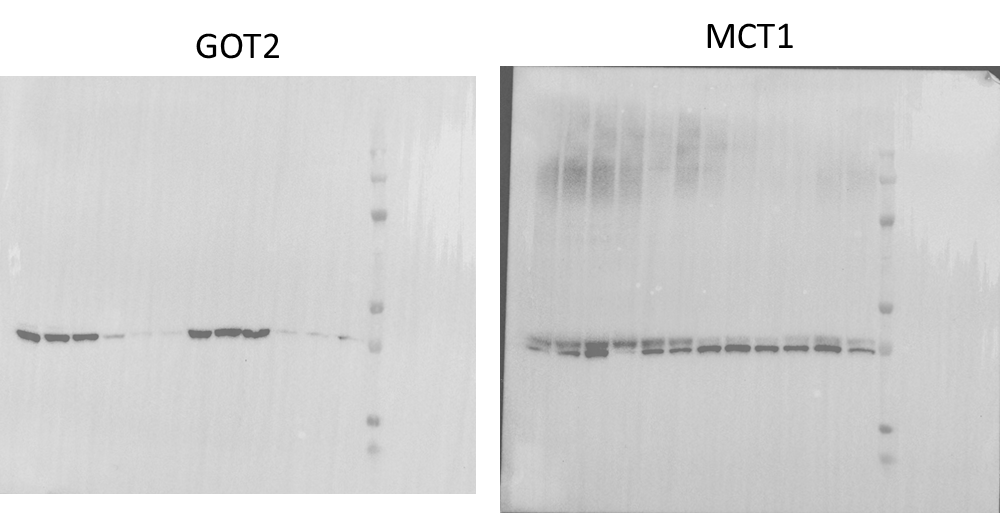


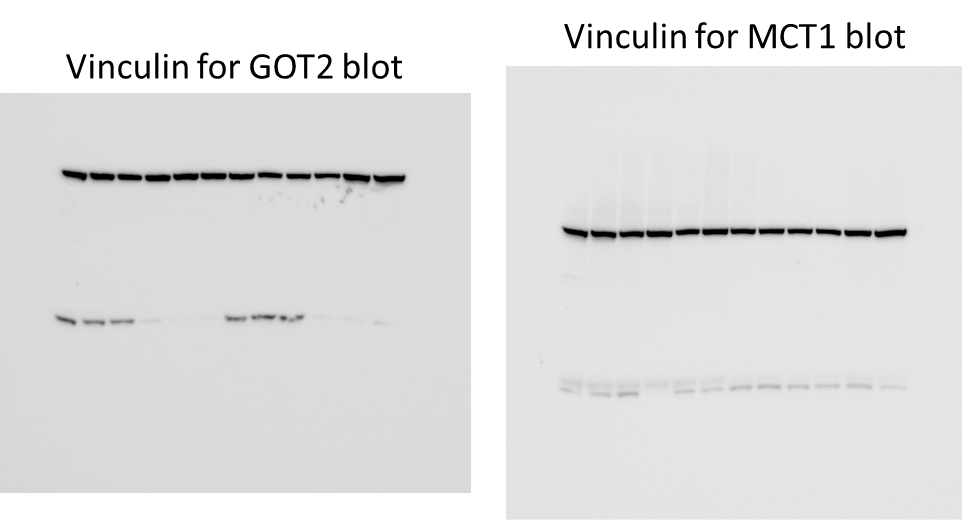


**Figure 6-figure supplement 2D**


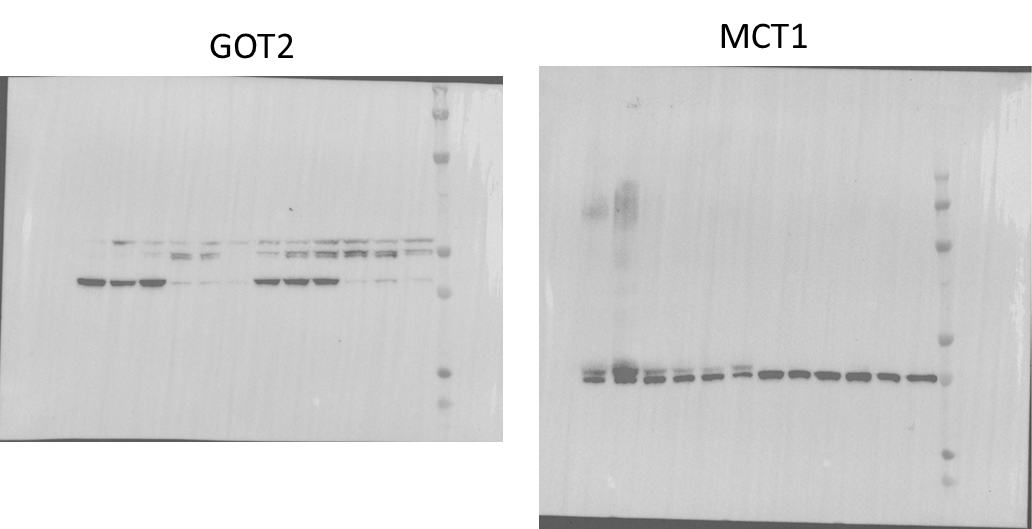


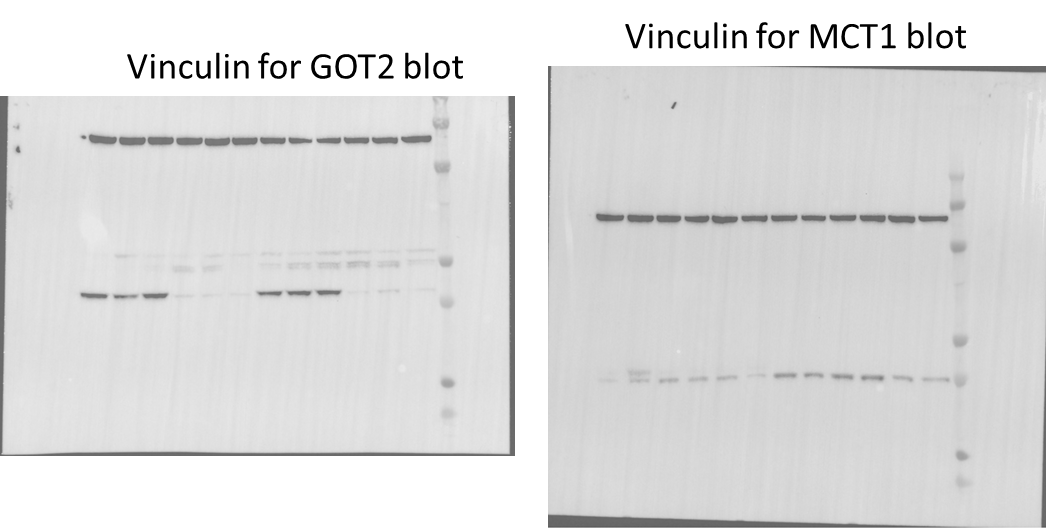


**Figure 6-figure supplement 2F**


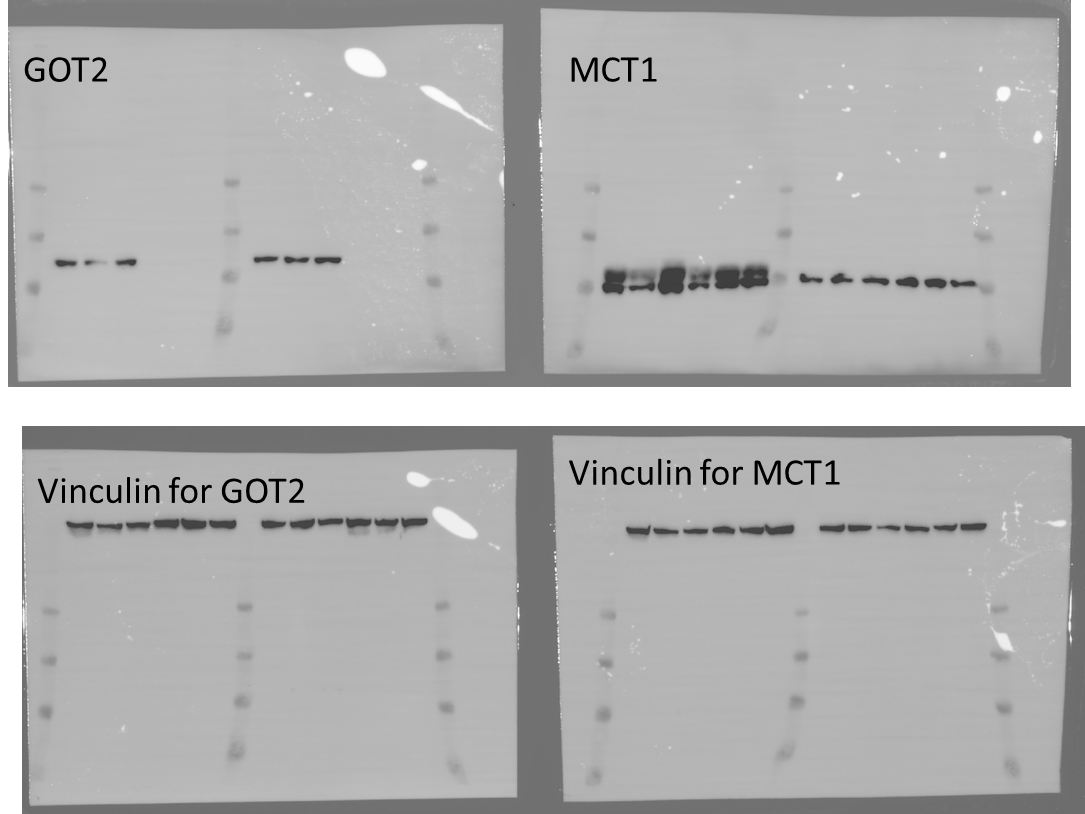


**
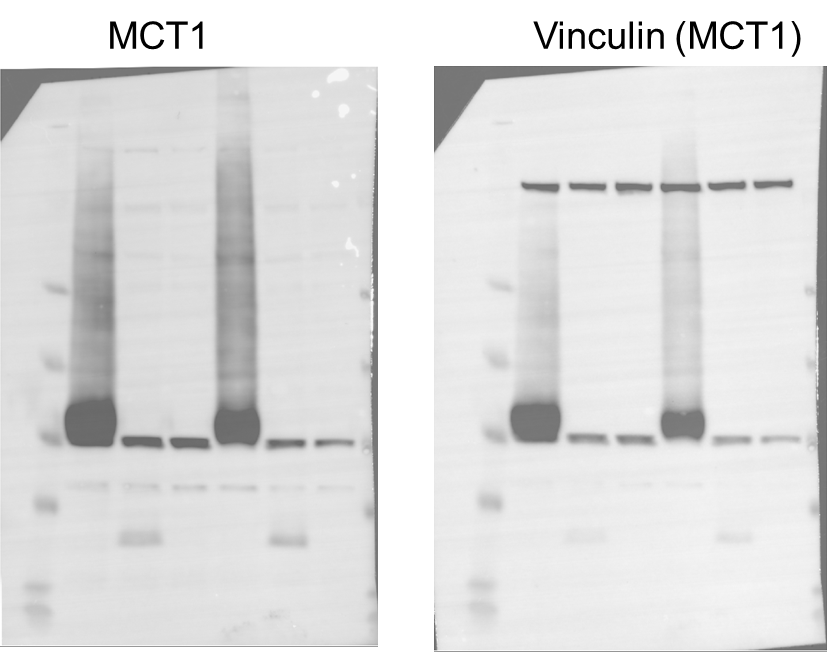

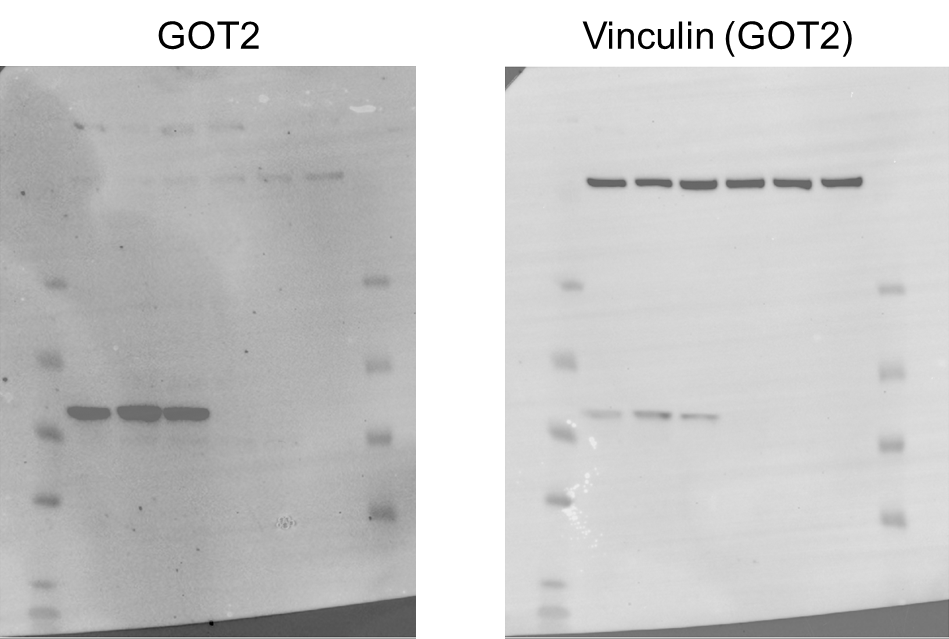
Figure 6-figure supplement 2G**

**
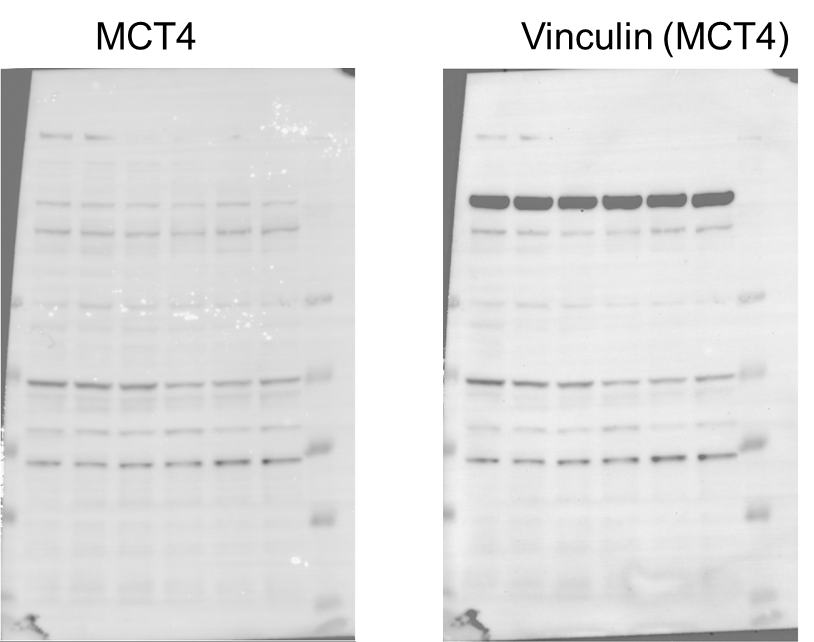
**

**Figure 6-figure supplement 2I**


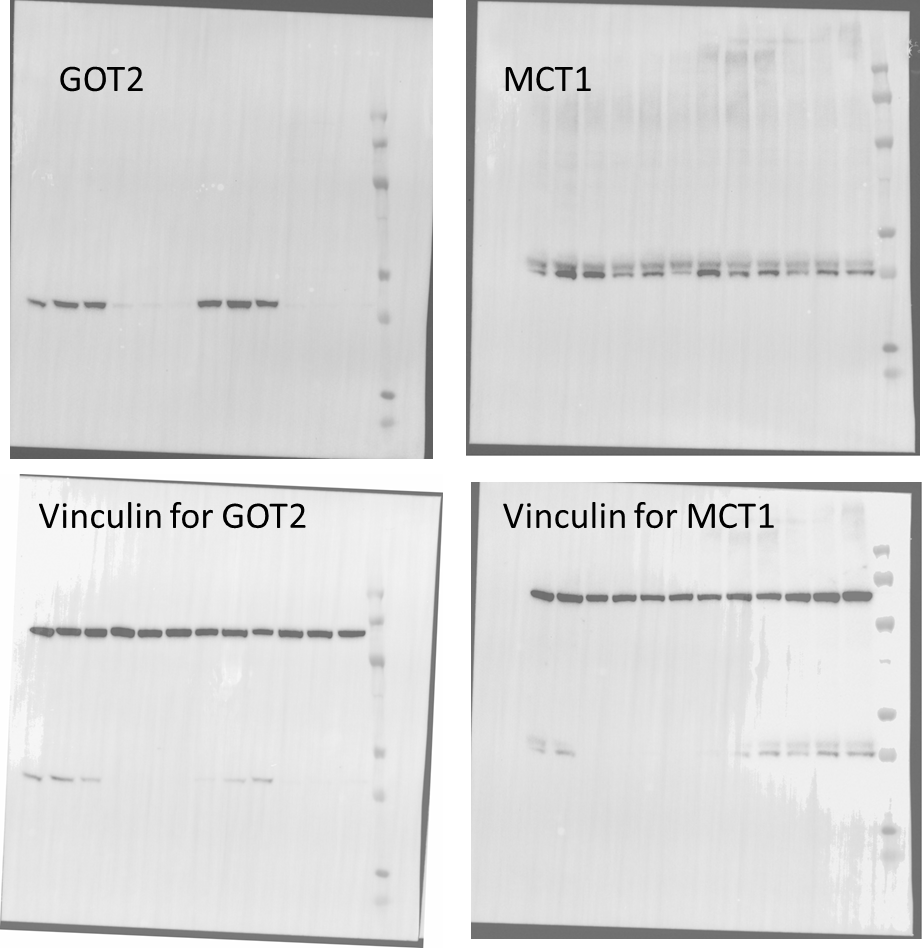

Supplement: supp [file Figure 6-figure supplement 2-source data 1.docx]
