# Supplementary material for: Metabolic requirement for GOT2 in pancreatic cancer depends on environmental context
Source: eLife. 2022 Jul 11;11:e73245. doi: 10.7554/eLife.73245 (PMC9328765; doi:10.7554/eLife.73245)
Supplement: Supplementary file 1. [file elife-73245-supp1.xlsx]

## Sheet: PaTu-8902 iDox-shGOT2.1 cells
Metabolite	-Dox rep1	-Dox rep2	-Dox rep3	+Dox rep1	+Dox rep2	+Dox rep3
±-Mevalonolactone	57.3377	65.6992	366.344	75.3255	12.4029	54.0281
2-2-Dimethyl Succinic acid	4.99389e+06	5.25674e+06	4.73444e+06	1.59843e+06	1.62441e+06	1.28034e+06
2-3-Dihydroxybenzoic acid	105.525	113.473	378.91	1127.56	2195.61	212.056
2-3-Dihydroxyisovalerate	356.646	421.226	18.4815	89.0148	144.387	154.778
2-3-Pyridinedicarboxylic acid	3016.11	3132.39	2987.06	4528.46	3411.72	4235.41
2-4-Quinolinediol	45.547	43.6636	53.0317	39.7634	23.4562	26.71
2-Deoxyadenosine 5-diphosphate	30.4127	10.8075	16.3649	22.0992	10.8868	24.12
2-Deoxyadenosine 5-monophosphate	108.112	80.8702	64.8396	1016.34	105.078	154.234
2-Deoxyadenosine	174.997	697.012	228.765	308.742	180.337	121.371
2-Deoxycytidine 5-diphosphate	12.8177	20.3207	23.3966	4.56096	7.70365	27.1643
2-Deoxycytidine 5-monophosphate	5616.41	5575.29	5110.3	5364.58	5050.52	4998.37
2-Deoxycytidine	1535.35	923.93	1079.55	1013.93	429.506	607.143
2-Deoxy-D-glucose 6-phosphate	2081.52	359.76	1043.75	4974.49	2329.78	3158.81
2-Deoxy-D-ribose	670.977	840.845	464.401	364.626	554.935	421.047
2-Deoxyguanosine 5-diphosphate	34060.8	33934.9	27688	47244.7	44252.9	39289.4
2-Deoxyguanosine 5-monophosphate	157616	157023	132527	321273	279526	277258
2-Deoxyguanosine	7.26242	10.0231	4.48286	10.1013	4.32649	6.22759
2-Deoxyinosine	45.7472	165.485	44.1059	38.3961	147.96	209.366
2-Deoxyribose 5-phosphate	15041.2	14498.4	656.978	946.587	1466.27	846.961
2-Deoxyuridine 5-triphosphate	21.7131	28.8651	8.97993	14.2658	13.4962	39.3017
2-Deoxyuridine	159.575	66.3356	94.9911	379.276	345.469	617.027
2-Isopropylmalic acid	722.551	355.132	639.824	72.776	262.801	504.41
2-Ketobutyrate	8178.88	8982.97	9219.02	10511.7	11795.5	15121.7
2-Methyl-1-butanol	90415.1	105638	102484	11487.4	15141.8	18705.5
2-Phosphoglyceric acid	550215	576756	444810	368588	383276	323666
3-2-Hydroxyethylindole	21.4698	8.99841	27.8065	35.6525	2.42823	16.6068
3-Dehydroshikimic acid	2022.81	439.607	222.019	4059.43	598.988	306.755
3-Hydroxyanthranilic acid	32.0753	150.987	80.1247	73.8421	144.658	63.1311
3-Hydroxy-DL-kynurenine	19.3183	19.1161	6.94867	14.945	22.1787	23.1579
3-Hydroxyphenylacetic acid	61.8658	67.4538	61.1796	330.851	82.7618	11.2412
3-Indoleacetic acid	85.7768	83.4234	187.387	354.277	253.204	227.217
3-Methylglutaric acid	4.94329e+06	5.08217e+06	4.6609e+06	1.57451e+06	1.62432e+06	1.25625e+06
4-Aminobenzoic acid	26.631	83.5331	61.3986	24.9674	21.8531	11.3277
4-Guanidobutyric acid	29.8392	34.4745	31.8702	34.0826	33.5229	0.178905
4-Hydroxybenzoic acid	7628.3	7070.06	7051.43	6106.76	6130.91	5100.48
4-Hydroxy-L-glutamic acid	16348.5	38783.6	36575.3	14933.9	13449.7	5062.82
4-Hydroxyphenyl-pyruvic acid	1935.15	1599.97	1764.26	364.608	275.053	423.577
4-Methyl-2-oxovaleric acid	68800.6	66106.9	69079	37164.6	82347.3	64900.8
4-Pyridoxic acid	3388.82	2757.21	2507.72	3721.47	3516.92	3136.17
4-Quinolinol	9.49061	18.9346	5.38203	11.2835	12.1933	9.38407
5-Deoxy-5-(methylthio)adenosine	85193.7	77404.5	72106.9	135651	113060	104847
5-Hydroxy-3-indoleacetic acid	411.608	608.858	818.151	834.492	591.334	731.376
5-Methoxytryptamine	46.5667	45.834	11.0487	101.411	6.20322	8.27054
6-Hydroxynicotinic acid	330.844	80.1694	14.6752	22.6851	8.01934	18.5725
Adenine	10615.2	17229.2	14483.3	47652.3	12114.5	38253.2
Adenosine 3-5-cyclic monophosphate	7953.04	7751.36	7493.32	10257.1	7999.36	9647.75
Adenosine 5-diphosphate	34060.8	33934.9	27688	47244.7	44252.9	39289.4
Adenosine 5-monophosphate	1416.63	1081.24	874.66	1286.02	800.169	916.409
Adenosine 5-triphosphate	819158	779974	633014	961177	883202	829705
Adenosine	11801.8	4639.68	4537.13	15883	15007.8	35426.5
Adenylosuccinic acid	148.917	157.962	17.2038	50.1613	306.907	270.91
Adipic acid	4.91216e+06	4.97829e+06	4.61479e+06	1.57504e+06	1.62515e+06	1.24056e+06
AICAR	7.92584	4.6213	13.9752	13.6916	17.8403	29.1612
Allantoin	2235.24	3043.9	3215.68	2732.29	2458.02	2600.74
alpha-D(+)Mannose 1-phosphate	1.28947e+06	1.32655e+06	1.11357e+06	1.95284e+06	1.97751e+06	1.82123e+06
alpha-D-Glucose-1-phosphate	1.10153e+06	1.13368e+06	971925	1.70827e+06	1.6681e+06	1.55214e+06
alpha-Ketoglutaric acid	4.99389e+06	5.25674e+06	4.73444e+06	1.59843e+06	1.62441e+06	1.28034e+06
Arabinose-5-phosphate	297750	303756	240415	814391	947218	495048
Argininosuccinic acid	1894.9	1425.53	1578.98	1623.74	1224.38	1540.81
beta-Nicotinamide adenine dinucleotide	759961	718078	623789	763486	704509	669634
beta-Nicotinamide mononucleotide	759.551	1322.3	226.421	1512.99	9841.29	807.23
Cellobiose	2973.68	3439.98	2086.63	3177.07	2196.92	1053.45
Chorismic acid	8318.5	8485.22	7701.95	17620.8	4089.87	14992.9
cis-Aconitic acid	1.01883e+06	979040	865773	527825	523843	474622
Citramalic acid	218908	209421	200981	279343	266304	259033
Citric acid	4.32948e+06	4.3943e+06	4.15341e+06	3.59124e+06	3.56824e+06	3.5923e+06
CoA	785.245	920.675	773.675	1036.71	925.521	734.333
Creatine phosphate	459.376	109.575	129.454	174.035	76.9599	282.108
Creatine	174956	189169	171768	124694	140903	131300
Creatinine	4335.83	6381.21	4667.6	5880.79	5279.44	6513.25
Cysteine	492.216	936.519	938.118	538.652	207.841	128.677
Cytidine 5-diphosphate	6.84989	25.0458	49.5452	14.6538	109.327	23.0502
Cytidine 5-triphosphate	2783.74	2266.16	1863.04	4122.99	3740.9	3101.68
Cytidine	21.7749	1.08657	20.3674	21.9702	19.8591	38.9432
Cytidine-5-monophosphate	10027.3	9861.84	8691.76	9759.62	9813.15	7667.44
Cytosine	262.96	138.984	107.76	51.2083	161.609	69.4731
D-+-Galactosamine	76.7679	6.33567	12.2056	35.4462	19.6417	18.4225
Deoxyadenosine 5-triphosphate	922.693	938.218	619.597	1486.47	1842.25	1231.07
Deoxycytidine 5-triphosphate	198.999	15.2884	32.6518	368.274	296.485	239.775
Deoxyguanosine 5-triphosphate	819158	779974	633014	961177	883202	829705
Deoxythymidine 5-triphosphate	22052	18513	14552.5	29806.4	27258.5	25202.8
D-erythro-Dihydrosphingosine	606.773	257.334	602.98	1115.82	1765.16	1533.37
D-Fructose 1,6-biphosphate	87496.6	88672.3	66290.9	368229	378543	342080
D-Fructose 6-phosphate	1.258e+06	71863.4	1.11357e+06	1.95436e+06	1.9428e+06	1.78646e+06
D-Gluconic acid	194471	201327	181459	408700	416904	348613
D-Glucosamine 6-phosphate	498.853	116.9	600.989	150.111	305.169	311.313
D-Glucose 6-phosphate	158349	253807	212341	183909	113562	204066
Dihydroxyacetone phosphate	658582	629033	528925	1.37426e+06	1.39053e+06	1.10359e+06
DL-2-Aminoadipic acid	70897	60743.6	65278.9	20660.2	30690.1	25320.4
DL-Glyceraldehyde 3-phosphate	658582	629033	528925	1.37426e+06	1.39053e+06	1.10359e+06
DL-Isocitric acid	4.32948e+06	4.3943e+06	4.15341e+06	3.59124e+06	3.56824e+06	3.5923e+06
D-Maltose	2973.68	3439.98	2086.63	3177.07	2196.92	1053.45
D-Mannose	75969.9	55991.7	68138.9	62410.1	62171	75638.1
D-pantothenic acid	3.44306e+06	3.55765e+06	3.11721e+06	4.42104e+06	4.32264e+06	4.12041e+06
D-Ribose 5-phosphate	41930.3	297621	240415	798208	912776	495048
D-Ribulose 1,5-biphosphate	17252.9	18034.1	14516.5	9321.21	15706.2	8660.27
D-Sedoheptulose-7-phosphate	19648	19561.4	19540.8	51742.6	42720.2	46007.2
D-Xylose	14298.1	11883	14885	22914.3	21063.3	23073.6
D-Xylulose-5-phosphate	31664.5	585251	520381	2.16555e+06	2.21399e+06	1.92059e+06
Epicatechin	443.503	118.518	504.896	462.934	266.876	179.011
Flavin adenine dinucleotide	7.66098	43.0864	29.8098	27.0217	120.622	137.064
Folinic acid	43.6453	0.352891	0.425427	30.0389	34.8083	40.344
Galactonic acid	22072.1	12817.1	19941.3	34504.7	33664.5	27306.2
gamma-Aminobutyric acid	398.394	189.998	352.432	473.533	188.009	62.9543
gamma-Glu-Cys	57471.8	68841.3	58037.2	106133	97497.7	103785
Glucoheptonic acid	10674	13126.3	10759.4	9819.67	10037.1	9348.16
Glutathone red	6.64754e+06	6.68683e+06	6.41417e+06	2.2587e+06	2.24944e+06	6.90987e+06
Glyceric acid	10245.1	9277.17	7435.77	14599.3	13856.3	12857.8
Glyoxylic acid	131.054	193.173	151.664	58.2375	30.0885	176.805
Guanine	16.0606	15.5535	11.0466	28.9763	1.01494	17.2419
Guanosine 3,5-cyclic monophosphate	19.3886	1.4615	10.1172	2.00436	1.83564	9.36536
Guanosine 5-diphosphate	23.2779	95.9375	10.0567	40.9493	32.7834	12.6646
Guanosine 5-triphosphate	3872.45	3224.24	2442.53	4041.29	4556.34	3520.59
Guanosine	533.634	387.869	233.288	1269.57	2839.22	2796.78
Homocitrate	1778.01	2091.6	1465.31	4583.68	1391.68	3804.32
Hypoxanthine	338.848	233.746	133.44	1597.46	1437.04	1221.8
Indoline-2-carboxylate	441.747	140.836	231.383	227.325	139.741	114.167
Inosine 5-diphosphate	10.7255	12.0015	24.8882	29.4538	33.8305	33.5773
Inosine 5-monophosphate	4035.66	3889.85	3378.88	7947.99	7766.62	7177.77
Inosine 5-triphosphate	40451.1	39412.6	31921	47532.9	45063.9	40881.8
Inosine	1004.2	266.338	269.286	6177.74	7335.97	6181.12
Isopentenyl pyrophosphate	97.3299	76.5776	156.521	48.0793	141.488	90.3773
Isopentyl acetate	47002.7	66037.1	66740.6	37195.1	82595.9	64900.8
Itaconic acid	68800.6	66106.9	69079	37164.6	82347.3	64900.8
Ketoisovaleric acid	259.529	666.634	1028.56	204.776	450.118	352.117
Ketovaleric acid	553932	512544	453848	424146	423712	460336
Lactic acid	2.19774e+06	2.23078e+06	2.18145e+06	2.26458e+06	2.20802e+06	2.23492e+06
L-Arabinose	13530.7	11883	14356.2	22727.2	21371.7	23086.6
L-Arabitol	3895.96	4156.71	5129.72	19205.1	21581	20951.3
L-Arginine	2254.02	4818.87	3469.59	5645.49	4795.81	5359.65
L-asparagine	345.174	1146.37	1128.29	553.391	1043.72	1752.77
L-Aspartic Acid	2.88907e+06	3.03373e+06	2.69215e+06	1.02524e+06	965446	949849
L-Canavanine	7.52051	50.0828	176.555	11.8075	59.6651	1.11125
L-Carnitine	2446.73	2275.76	2932.14	1738.58	1095.73	1794.25
L-Citrulline	1063.96	1654.52	1844.08	1581.86	1839.16	3224.83
L-Cystathionine	498.847	657.152	597.049	73.3943	366.844	168.589
L-Cystine	26.5116	6.60897	26.7173	31.8667	149.213	39.0579
L-Dihydroorotic acid	3332.72	3438.34	137.818	121.655	106.535	93.018
L-Glutamic acid	6.06639e+06	6.11641e+06	1.05589e+07	4.97344e+06	5.30212e+06	1.26013e+07
L-Glutamine	226697	215948	215159	216977	212181	227353
L-Gluthathione (oxidized)	1.39398e+06	1.43383e+06	1.21809e+06	1.76515e+06	1.78968e+06	1.72964e+06
L-Histidine	10630.8	10302.8	9556.49	9322.69	9840.94	10382.5
L-Homocysteine	26.0642	19.9186	14.9862	26.984	77.0723	79.6794
L-Homocystine	35.5109	55.0997	25.2694	143.603	180	27.937
L-Homoserine	295.623	365.898	201.182	76.5286	213.858	20.3268
L-Hydroxyglutaric acid	712340	668964	642815	902080	871538	840213
Lipoamide	7.92927	15.8884	13.7327	19.3367	12.8101	7.78775
L-Isoleucine	14796.3	14222.3	11842.3	19086.1	19031.6	16564.6
L-Kynurenine	13746.3	12188.9	13006.5	14719	14963.3	14349.9
L-Leucine	14796.3	14222.3	11842.3	19086.1	19031.6	16564.6
L-Malic acid	2.72585e+07	2.75272e+07	2.5624e+07	2.48872e+07	2.49152e+07	2.4081e+07
L-Methionine	311175	287306	266986	421974	405273	440182
L-Phenylalanine	1.44375e+06	1.60053e+06	1.5045e+06	2.34881e+06	2.27748e+06	1.97712e+06
L-Proline	2710.4	2451.94	2052.26	1859.9	2044.66	1865.39
L-Serine	13285.7	13550.4	13594.3	21224.3	19863.3	26676.6
L-Sorbose	224203	231525	230884	307188	281022	291038
L-Threonine	223078	191626	192407	169905	331679	182874
L-Tryptophan	545162	545797	500731	586879	643677	624962
L-Tyrosine	688950	556599	520568	776360	732319	858886
Maleic acid	25192.1	20241.1	24361.9	9018.47	18912.3	24791
Malonic acid	79633	75109.7	73559.4	91490.7	89024.4	73260.5
Melibiose	30.7508	116.907	40.9015	262.827	498.042	551.618
Mevalonic acid 5-phosphate	33865.5	74276.4	10656.9	16846.4	62599.3	71888.8
Mevalonic acid	1194.46	1291.01	1037.89	1997.07	1772	1271.87
m-Hydroxybenzoic acid	572.001	703.856	607.185	447.741	729.461	230.218
myo-Inositol	1.88105e+06	1.88794e+06	1.83503e+06	2.22655e+06	2.10395e+06	2.16397e+06
N-Acetyl D-galactosamine	484.947	379.616	570.365	1161.62	888.711	710.461
N-Acetyl-alpha-D-glucosamine 1-phosphate	247126	246890	227636	558125	558866	525012
N-acetylaspartate	5.54923e+06	5.54967e+06	4.999e+06	3.3181e+06	3.2077e+06	3.10401e+06
N-acetylaspartylglutamate	931864	862494	782966	868704	807600	838277
N-Acetyl-D-glucosamine 6-phosphate	118363	116292	107022	204265	198291	191863
N-Acetylglutamic acid	550684	546486	479088	861838	878387	809630
N-Acetylneuraminic acid	297820	269694	254725	89396.4	85312	113261
N-Carbamoyl-DL-aspartic acid	1.16213e+06	1.08902e+06	937444	599304	615614	581556
N-Carbamyl-L-glutamic acid	4175.48	4504.2	3289.91	7595.49	8261.44	7422.52
N-Formyl-L-Tyrosine	1251.36	1966.66	4464.83	4495.23	2893.64	1674.37
Nicotinic acid mononucleotide	85.6203	57.6783	74.6459	88.1145	76.2255	34.3368
Nicotinic acid	1153.72	549.656	602.637	662.618	440.651	715.981
o-Hydroxy hippuric acid	114.815	453.649	277.808	793.632	716.992	890.872
o-Phospho-L-Serine	13.8108	22.6176	13.3476	23.4518	5.3859	9.29729
O-Phosphorylethanolamine	2460.93	8511.41	1323.4	11800.3	11463.6	123838
Orotic acid	124.187	585.132	54.4008	774.17	1394.94	1087.91
O-Succinyl-L-homoserine	79.0299	93.7592	204.918	1052.31	933.81	353.23
Oxamic acid	153.199	329.74	372.072	128.733	448.205	33.8373
Phenylpyruvic acid	921.431	936.901	2161.29	2098.36	2334.79	2234.49
Phosphoenolpyruvic acid	57659.9	65019	51704.1	15876.6	15588.5	13363.1
Prephenic acid	89.7739	72.9773	31.3812	22.6869	78.8032	61.8252
Pyridoxal 5 phosphate	17482.8	17012.3	15861.7	15465.4	13883.2	16256.7
Pyridoxal hydrochloride	18110.3	6222.08	14407.6	13672.4	12479.7	13155.5
Pyridoxamine	23.6317	2.02636	5.46463	27.9041	37.1272	25.0262
Pyridoxine	176279	146087	136308	210838	184293	205726
Pyruvic acid	90415.1	105638	102484	11487.4	15141.8	18705.5
Quinic acid	211.453	1.76798	9.95736	576.244	277.393	293.576
Remove	16.0672	31.1877	11.3795	13.5919	8.16175	2.64619
Riboflavin	7770.23	6531.38	6427.65	9089.27	8486.82	8153.46
Ribonic acid gamma lactone	163.409	119.995	157.794	91.1773	144.724	31.0807
S-2-Aminoethyl-L-cysteine	0.575536	0.368732	2.55574	1.04067	0.842302	0.51161
S-5-Adenosyl-L-homocysteine	24592.1	32243.4	19827	18269.2	18518.9	14324.5
Salicylic acid	19387.6	11464.3	11609.6	19527.3	17834.2	16109.5
Shikimic acid	22.8336	5.53514	16.7646	22.1423	6.68725	14.2888
Succinic acid	7.30178e+06	7.40604e+06	6.93731e+06	8.55971e+06	8.3762e+06	8.18326e+06
Succinic semialdehyde	347.812	73.189	204.49	439.42	319.856	210.84
Taurine	1.08682e+06	1.06346e+06	1.01312e+06	642562	688287	843277
Taurocholic acid	636.197	648.382	582.462	1230.8	916.248	913.989
Thiamine	4157.17	3899.83	3948.29	5766.33	5389.44	5927.41
Thymidine 5-diphosphate	26218	24353.7	21845.2	22839.9	21559.5	23236
Thymidine	219.529	105.847	34.8678	66.817	438.094	254.541
Thymine	56.4024	12.5372	41.3775	57.7083	291.177	44.8151
trans-4-Hydroxy-L-proline	2537.1	2218.57	2553.15	2867.87	2667.07	1813.06
trans-Aconitic acid	1.02034e+06	981903	865773	529411	513925	474622
trans-trans Muconic acid	15.2849	20.622	22.6473	10.767	19.7309	41.1215
Trehalose 6-phosphate	67.1376	72.7005	23.0685	71.1079	226.743	75.9312
Trehalose	938.878	286.8	1096.49	1504.74	875.825	1292.03
Uracil	1339.51	3268.33	3733.15	5429.68	7834.87	8.68488
Uric acid	45143.7	47401.2	40604.3	60743.9	52521.9	47183.8
Uridine 5′-diphosphogalactose	2.10428e+06	1.92929e+06	1.59658e+06	2.45483e+06	2.37126e+06	2.33577e+06
Uridine	1992.95	318.226	321.561	4947.83	3272.19	5700.06
Uridine 5-diphosphate	10472.7	10177	8709.48	12778.1	14088.8	11198
Uridine 5-diphosphoglucose	2.10428e+06	1.92929e+06	1.59658e+06	2.45483e+06	2.37126e+06	2.33577e+06
Uridine 5-monophosphate	55784.1	54584.1	42130.8	61627.4	57107.9	71350.1
Uridine 5-triphosphate	480065	438614	348890	517783	483612	481415
Vanillic acid	1503.28	4158.03	363.555	192.236	588.181	583.962
Xanthine	63037.3	105374	51671.3	69885.2	136864	162220
Xanthosine	14839.1	14142.2	12360.1	75129.9	69880.4	66870.6
Xylitol	3895.96	4156.71	5129.72	19205.1	21581	20951.3

## Sheet: MIAPaCa-2 iDox-shGOT2.1 cells
Metabolite	-Dox rep1	-Dox rep2	-Dox rep3	+Dox rep1	+Dox rep2	+Dox rep3
2-2-Dimethyl Succinic acid	1.40412e+06	1.95023e+06	1.78107e+06	347017	294601	192890
2-Deoxyguanosine 5-diphosphate	30396	51119.2	43833.2	13797.7	19250.6	12589.4
2-Deoxyguanosine 5-monophosphate	87332	117577	111421	71181.9	89826.2	69992.3
2-Deoxyribose 5-phosphate	7097.82	7997.2	7229.99	9284.76	5328.84	7752.68
2-Isopropylmalic acid	6208.27	6106.96	7118.93	5462.93	6710.02	6429.42
2-Ketobutyrate	158102	153644	157256	150607	149775	155754
2-Methyl-1-butanol	41257.3	61096.2	35883.6	7377.37	7727.02	6257.23
2-Phosphoglyceric acid	48703.4	66133.7	58871.2	17105.2	21338.1	15743.7
3-Methylglutaric acid	1.40412e+06	1.95023e+06	1.78107e+06	347017	294601	192890
4-Hydroxybenzoic acid	9184.77	7341.85	7126.64	7082.24	8711.59	7897.79
4-Hydroxy-L-glutamic acid	3731.92	5030.34	5049.68	3296.84	3337.54	2919.54
4-Methyl-2-oxovaleric acid	72921.6	81302.2	67015.9	83947.3	82131.7	72640.5
5-Deoxy-5-(methylthio)adenosine	100897	133082	127494	36915.4	44183	36576.1
Adenine	9009.87	9538.2	11029.5	4493.58	7286.32	4043.89
Adenosine	3409.32	3314.13	3434.84	23195.1	21430.4	21693.2
Adenosine 3-5-cyclic monophosphate	2162.87	3181.34	4139.13	4770.54	6191.67	5982.87
Adenosine 5-diphosphate	30396	51119.2	43833.2	13797.7	19250.6	12589.4
Adenosine 5-monophosphate	87332	117577	111421	71181.9	89826.2	69992.3
Adipic acid	1.40412e+06	1.95023e+06	1.78107e+06	347017	294601	192890
alpha-D(+)Mannose 1-phosphate	111575	176979	153221	74364.7	84740.4	67916.5
alpha-Ketoglutaric acid	1.40412e+06	1.95023e+06	1.78107e+06	347017	294601	192890
Arabinose-5-phosphate	111950	140356	170709	198751	209808	140611
beta-Nicotinamide adenine dinucleotide	527864	674304	640767	232301	280660	219516
beta-Nicotinamide mononucleotide	14998.1	14976.5	14883.5	16022.1	14418.8	16661.2
cis-Aconitic acid	155984	224799	193084	60862.1	79445.8	59495.7
Citramalic acid	59646.7	72788.3	71310.5	22534	15390.6	20608
Citric acid	4.18695e+06	6.22975e+06	5.40655e+06	2.82585e+06	2.7913e+06	3.25073e+06
Creatine	165941	162300	118397	24983.8	35900.1	40811.3
Cytidine 5-diphosphate	4474.54	6059.71	4412.38	447.581	4782.09	639.686
Cytidine-5-monophosphate	3303.31	3984.02	3925.35	2114.45	1567.68	2349.27
D-Fructose 1,6-biphosphate	26564.8	41326.6	36959.4	70467	94050.7	62085.7
D-Fructose 6-phosphate	102784	132828	139111	64848.5	74340.6	58252
D-Gluconic acid	104908	140964	128548	52949.1	64033.2	58516.2
D-Glucose 6-phosphate	89228	107931	117984	52354	60524	51911
Dihydroxyacetone phosphate	136580	162376	165260	155980	213326	138275
DL-2-Aminoadipic acid	15299.8	20731.8	19040.4	9612.75	9597.11	8699.56
DL-Glyceraldehyde 3-phosphate	136234	161865	164821	173124	213326	138275
DL-Isocitric acid	3.86232e+06	5.37562e+06	4.63771e+06	2.64444e+06	3.18112e+06	3.55493e+06
D-Mannose	320077	364748	355276	532090	421030	589877
D-pantothenic acid	1.50708e+06	2.05348e+06	1.97011e+06	984763	1.20576e+06	934666
D-Ribose 5-phosphate	118719	150304	205759	226213	228037	151861
D-Sedoheptulose-7-phosphate	17158.1	23555.5	24056.9	8156.58	10189.6	8366.47
D-Xylose	9749.72	9749.12	8726.17	11011.1	16286.3	11160.6
D-Xylulose-5-phosphate	17026.8	22376.6	34595.6	25690.4	52498.3	31349.9
Galactonic acid	104908	140964	128548	52949.1	64033.2	58516.2
gamma-Glu-Cys	4202.46	9600.72	16897.1	10663.7	13694.9	7010.04
Glucoheptonic acid	3911.52	5051.62	3853.38	3906.95	467.564	4520.12
Glutathone red	2.23085e+06	3.84013e+06	4.35062e+06	2.71997e+06	2.9761e+06	1.84559e+06
Glyceric acid	5406.49	7798.89	6466.13	2824.58	3817.94	2827.65
Guanosine	748.619	1980.75	982.805	2481.39	3947.35	2744.84
Homocitrate	4130.48	5377.54	4870.45	3898.71	4712.39	3885.92
Hypoxanthine	572.401	1409.67	555.36	4478.73	6706.96	4426.03
Inosine	502.27	454.679	1136.18	3837.65	2449.33	4685.5
Inosine 5-diphosphate	2296.22	4241.42	3348.1	959.372	1243.98	616.568
Inosine 5-monophosphate	4793.9	6512.39	5375.18	14763.1	18259	12100.2
Isopentyl acetate	10713.1	15290.5	10786.5	3300.31	3639.34	4284.62
Itaconic acid	131998	130888	117971	124277	126020	125857
Ketovaleric acid	242237	240043	276316	81375.6	74463	91883.6
Lactic acid	928214	997300	949301	615473	667597	640455
L-Arabinose	9749.72	9749.12	8726.17	11011.1	16286.3	11160.6
L-Arabitol	4251.74	4211.32	3371.19	4917.66	6664.46	4566.44
L-Aspartic Acid	779480	1.01874e+06	949418	88232.1	91655.2	82888.9
L-Glutamic acid	6.68882e+06	7.56494e+06	7.52368e+06	5.27533e+06	5.42846e+06	5.09555e+06
L-Glutamine	88169.5	86845.2	90992.3	43274.9	40412.8	46393.4
L-Gluthathione (oxidized)	1.38283e+06	1.33441e+06	1.044e+06	706662	829966	973701
L-Hydroxyglutaric acid	184293	233123	223062	59968.6	72850.6	58330.1
L-Isoleucine	11196.9	14615.5	13840.2	10515.9	14265.4	10174.9
L-Kynurenine	5129.58	6468.54	6495.86	3558.48	3933.08	3715.79
L-Leucine	11196.9	14615.5	13840.2	10515.9	14265.4	10174.9
L-Malic acid	5.77219e+06	7.70425e+06	7.07737e+06	1.63877e+06	2.02122e+06	1.56428e+06
L-Methionine	139197	175881	177757	98731.2	122503	100860
L-Phenylalanine	869826	992755	996156	905244	939464	917579
L-Serine	11919.8	12452.1	12646.9	6018.76	6108.38	7516.33
L-Sorbose	172631	247288	231464	390347	400696	451299
L-Threonine	106622	102103	100736	36948	40044.4	45682.5
L-Tryptophan	200383	244458	244462	130108	166194	150403
L-Tyrosine	218686	284680	280000	173560	266316	171331
Maleic acid	20303.1	23112.5	17112.8	19868.4	20370.8	20202.3
Malonic acid	88928.9	89065.6	76751.3	85789.7	71725.1	85990.4
Mevalonic acid 5-phosphate	7507.7	10077.8	7571.37	12315.5	11311.2	8756.79
myo-Inositol	2.58931e+06	1.90111e+06	2.86727e+06	4.08584e+06	3.27533e+06	4.42394e+06
N-Acetyl-alpha-D-glucosamine 1-phosphate	15712.5	18395.5	18775.1	6521.18	10525.4	7504.07
N-acetylaspartate	4.86396e+06	6.35073e+06	6.12219e+06	472373	591339	443883
N-acetylaspartylglutamate	755031	1.04231e+06	964127	27343.9	37904.9	24737.4
N-Acetylglutamic acid	423200	567574	535137	167221	204830	153604
N-Carbamoyl-DL-aspartic acid	249681	319916	314995	26801.8	37666.1	25102.3
N-Carbamyl-L-glutamic acid	2630.24	4135.96	3379.03	1818.24	2697.17	2268.94
O-Phosphorylethanolamine	64872.8	86924.1	94013	340564	446330	327702
Phenylpyruvic acid	5181.21	4068.74	5216.91	3821.97	6499.91	2444.4
Phosphoenolpyruvic acid	18119.1	25854.3	24301.9	6421.18	6557.97	5169.33
Pyridoxal hydrochloride	8016.59	10111.6	9454.55	4911.85	6592.73	4683.41
Pyridoxine	49678.7	69900.3	68900	54853.4	81121.9	51680.8
Pyruvic acid	41257.3	61096.2	35883.6	12560.6	13171.7	9429.61
Riboflavin	3406.51	5018.32	4460.72	4361.24	5966.82	4285.94
S-5-Adenosyl-L-homocysteine	54138.2	77890	73361.3	17711.2	19995	12442.9
Salicylic acid	12931.4	11733.2	11713.1	11174.5	9459.36	10418
Succinic acid	960565	1.23086e+06	1.12186e+06	1.00834e+06	1.23687e+06	1.00192e+06
Taurine	77535.7	63782.9	70749	40956.8	38662.6	50330.2
Thiamine	2874.78	3836.2	3699.97	3208.12	3748.93	2916.22
trans-Aconitic acid	155984	224799	193084	60862.1	79445.8	59495.7
Uric acid	46916.7	66182.1	57147.9	57419.6	72692.9	57557.2
Uridine 5′-diphosphogalactose	849554	1.34519e+06	1.21638e+06	402294	529855	350271
Uridine 5-diphosphate	5697.57	8111.82	6941.73	3318.89	4222.08	3108.41
Uridine 5-diphosphoglucose	849554	1.34519e+06	1.21638e+06	402294	529855	350271
Uridine 5-monophosphate	59013.2	78096.5	53068	15106.4	17585.2	22098.1
Xanthine	27392.5	40462	34363.5	26938.3	37250.1	25463.8
Xanthosine	4203.29	6245.07	5872.16	7022.25	8020.01	6467.05
Xylitol	4251.74	4211.32	3371.19	4917.66	6664.46	4566.44

## Sheet: PaTu-8902 iDox-shGOT2.1 tumors
Metabolite	-Dox tumor 1	-Dox tumor 2	-Dox tumor 3	-Dox tumor 4	-Dox tumor 5	-Dox tumor 6	+Dox tumor 1	+Dox tumor 2	+Dox tumor 3	+Dox tumor 4	+Dox tumor 5	+Dox tumor 6
±-Mevalonolactone	98.322	152.762	76.6121	80.263	28.9263	83.4975	42.3123	12.1845	15.0063	122.272	34.7364	116.589
2-2-Dimethyl Succinic acid	318734	213470	307448	321523	343832	452940	451642	110536	442948	314841	369279	588770
2-3-Dihydroxybenzoic acid	201.115	344.098	390.427	1433.59	390.618	1548.13	183.632	2324.77	187.182	1993.71	220.74	239.083
2-3-Dihydroxyisovalerate	3848.35	4130.64	88.3194	113.123	971.365	61.5881	124.989	323.371	90.8752	126.23	222.717	95.7144
2-3-Pyridinedicarboxylic acid	41485.2	58199.5	20429.9	22558.8	26323.7	29387.5	33204.5	14848.2	17338	17434.5	36325.4	31439.3
2-4-Quinolinediol	68.4646	55.5295	118.315	63.8263	79.1662	34.6583	42.5518	21.5695	7.25729	104.177	82.4778	9.91296
2-Deoxyadenosine	1448.19	1861.95	1611.4	1871.46	1782.94	1686.33	209.203	1069.93	468.47	2120.7	154.052	1550.27
2-Deoxyadenosine 5-diphosphate	27.8294	484.505	73.3502	33.6988	51.4184	594.364	1070.43	49.929	82.1866	59.8245	1143.18	1439.27
2-Deoxyadenosine 5-monophosphate	14624.9	5115.72	4769.11	4074.67	4580.54	3299.99	16907.8	5044.39	12704.8	9711.12	9420.39	14705.5
2-Deoxycytidine	456.593	1134.95	2969.36	1606.4	1114.46	655.741	911.288	803.11	1200.87	1327.2	1479.36	2631.25
2-Deoxycytidine 5-diphosphate	26.348	27.2461	10.3769	30.1009	76.147	33.7356	16.185	13.143	21.3261	67.029	52.3307	49.4355
2-Deoxycytidine 5-monophosphate	11820.4	10933.8	9368.26	8775.71	3508.94	3873.32	22970	10269.6	12063.2	10645.4	19774.1	14285.3
2-Deoxy-D-glucose 6-phosphate	8189.39	12725.6	21481.5	33332.7	7819.92	6180.05	21771.3	38661	50649.6	55343.3	35444.6	22981.6
2-Deoxy-D-ribose	2625.7	3997.89	3383.72	1542.21	2825.23	3268.5	3192	2662.8	1670.06	1891.97	2875.53	1999.16
2-Deoxyguanosine	327.376	374.671	798.032	187.966	30.1372	27.851	54.0585	47.922	155.493	470.028	166.119	262.072
2-Deoxyguanosine 5-diphosphate	305961	333689	291773	241713	271730	218594	323290	322262	329544	364787	283434	265609
2-Deoxyguanosine 5-monophosphate	2.08316e+06	2.13772e+06	2.44286e+06	2.25967e+06	2.71783e+06	1.76328e+06	3.28735e+06	2.967e+06	3.40665e+06	4.32368e+06	2.82896e+06	2.52433e+06
2-Deoxyinosine	13210	15324	13246.8	6172.32	8716.41	8984.1	10990.7	8429	11678	7203.93	961.611	13272.8
2-Deoxyribose 5-phosphate	33490.9	1850.76	36480.9	35676.1	20498.5	28493.5	37042.2	2168.22	13004	23547.9	28995.9	39095.4
2-Deoxyuridine	8725.47	15505.1	16505.8	14860.5	13386.2	20033.8	48242.3	28936.8	16096.5	31168.6	18407.6	35035.6
2-Deoxyuridine 5-triphosphate	8.39805	15.7788	2.26959	31.2587	13.0692	18.5022	272.476	175.503	7.46851	41.4356	19.0589	4.88842
2-Isopropylmalic acid	1004.57	1700.02	808.02	1017.16	2327.85	1957.19	1466.32	1409.78	1501.03	1136.43	435.906	342.278
2-Ketobutyrate	4009.12	39456.6	9066.34	11782.1	47571.9	22254.5	5887.23	9205.11	5073.41	8086.4	12770.8	12003.7
2-Methyl-1-butanol	10945.8	6472.34	15939.8	16357.7	3720.92	5318.57	20926.8	179678	19764.4	8862.19	22267.6	2955.33
2-Phosphoglyceric acid	1.00896e+06	858599	504417	400589	490850	486429	409361	21998	327601	323321	217149	433708
3-2-Hydroxyethylindole	20.4207	43.9415	2.57472	28.3609	36.6465	10.8788	30.7211	43.8795	10.2048	11.0536	23.3839	16.2678
3-Dehydroshikimic acid	265.185	753.344	1142.12	114.429	2032.05	194.472	578.913	67.8278	102.344	434.626	509.667	542.39
3-Hydroxyanthranilic acid	1236.34	1514.79	803.968	458.29	1446.19	1684.27	2060.56	1083.41	250.332	1520.85	1174.47	1724.66
3-Hydroxy-DL-kynurenine	221.031	121.285	15.064	7.7343	235.647	92.9743	273.012	563.611	361.608	35.7097	245.592	1086.81
3-Hydroxyphenylacetic acid	274.875	168.917	109.673	154.506	345.54	196.511	164.685	29.0652	81.9215	120.514	173.622	131.007
3-Indoleacetic acid	1006.57	2002.36	417.654	2970.9	584.096	381.854	376.416	445.302	456.931	650.768	850.878	429.137
3-Methylglutaric acid	324285	213470	307115	321523	343832	451982	451954	110550	355416	314897	362000	588770
4-Aminobenzoic acid	20.6518	86.4085	49.6674	119.704	36.3493	52.7758	38.3112	121.222	32.8997	60.0685	36.8455	47.3793
4-Guanidobutyric acid	21.8641	2.25019	0.400937	29.2523	39.2513	11.3084	22.9439	24.4262	18.8002	29.2573	29.9252	1.9017
4-Hydroxybenzoic acid	24738.1	39029	21058.9	15974.9	25323.6	26446.8	14309.4	13158.1	16551.7	15535.6	14737.9	15760
4-Hydroxy-L-glutamic acid	26427.1	40064.7	40453.6	39912.1	42082.8	34885.2	38347.6	50119	22198.3	21874.2	25697.8	40702.5
4-Hydroxyphenyl-pyruvic acid	1365.54	501.031	2230.51	907.289	991.579	1207.32	1084.59	725.851	388.742	372.798	674.559	2425.17
4-Methyl-2-oxovaleric acid	424715	570613	324001	293825	391817	324570	428713	323806	422500	388765	478198	396820
4-Pyridoxic acid	2393.07	3984.94	1369.45	2241.66	2161.82	3015.96	3742.42	2147.69	2507.56	2868.9	2191.91	2526.46
4-Quinolinol	8.15426	12.331	11.8781	15.4599	1.2356	6.83245	14.6787	5.41291	10.8049	14.556	10.3206	9.44523
5-Deoxy-5-(methylthio)adenosine	38533.5	35666.4	44408.6	47000.8	49642.5	46189.7	42783.5	12096.4	29588.2	27931.8	41130	48873.1
5-Hydroxy-3-indoleacetic acid	111.211	217.557	575.732	392.854	104.84	158.461	858.245	135.829	594.7	25.4358	588.337	189.373
5-Methoxytryptamine	1.20514	51.0317	13.2396	55.5459	12.438	6.82668	12.4817	19.2353	13.502	6.89031	22.3097	27.883
6-Hydroxynicotinic acid	206.38	61.0378	368.347	317.49	61.1955	183.532	169.693	65.5197	336.786	78.8754	207.485	388.749
Adenine	26192.1	47246	5802.57	1432.87	89584.3	37426.3	729.702	11863.8	25002.2	19940.7	866.832	3793.67
Adenosine	17678.2	2994.23	6498.77	6921.72	85045.7	87777.5	9479.14	430532	30467.5	58502.1	26801.3	2193.19
Adenosine 3-5-cyclic monophosphate	443001	136970	286904	40422	437958	135485	360617	277685	450977	413029	123388	180196
Adenosine 5-diphosphate	305961	333689	291773	241713	271730	218594	323290	322262	329544	364787	283434	265609
Adenosine 5-monophosphate	4140.82	5632.7	7228.5	4229.53	6771.99	4511.35	6944.86	7769.97	5251.67	7144.42	8176.29	7798.21
Adenosine 5-triphosphate	3.40686e+06	3.86939e+06	2.94126e+06	2.49544e+06	2.03038e+06	2.37537e+06	2.87772e+06	2.90256e+06	2.86208e+06	2.5057e+06	2.9569e+06	2.64506e+06
Adenylosuccinic acid	4247.35	3758.13	4104.69	3611.3	2988.05	1828.89	10584.9	17153	5184	7056.88	10476.4	6407.24
Adipic acid	313918	195640	307164	296850	343328	452940	437341	81832.5	399086	316263	379239	579887
AICAR	80.646	279.635	162.486	79.467	213.032	58.1955	946.213	1188.12	23.4479	104.504	1979.89	1357.54
Allantoin	4699.04	6111.02	5131.25	4509.12	4432.1	4442.22	7276.13	6547.17	6412.18	5341.26	5846.18	5774.57
alpha-D(+)Mannose 1-phosphate	8.32825e+06	1.08953e+07	1.0973e+07	5.9443e+06	1.02125e+07	1.20269e+07	5.67791e+06	1.24726e+06	6.7051e+06	5.77649e+06	4.88802e+06	5.97662e+06
alpha-D-Glucose-1-phosphate	7.46857e+06	9.26503e+06	9.79335e+06	5.07338e+06	8.79158e+06	1.0325e+07	4.93003e+06	990787	5.75395e+06	4.95491e+06	4.33008e+06	5.26055e+06
alpha-Ketoglutaric acid	318734	213470	307448	321523	343832	452940	451642	110536	442948	314841	369279	588770
Arabinose-5-phosphate	660209	514120	339701	180039	280564	133586	450633	759305	383438	422505	461979	291293
Argininosuccinic acid	8842.3	6462.73	7155.56	3450.85	6077.46	6068.74	9815.18	3778.69	8658.3	8117.07	6156.29	7662.86
beta-Nicotinamide adenine dinucleotide	711406	782704	731443	601263	686229	793426	660832	6612.22	742373	639203	649871	697611
beta-Nicotinamide mononucleotide	2126.4	3368.4	1012.82	2940.11	5111.95	2577.18	3759.99	3102.28	4443.95	4229.54	12569.8	2208.33
Cellobiose	2230.82	1520.29	3718.03	2013.73	1443.3	2625.75	776.787	802.608	907.169	839.539	251.536	2174.89
Chorismic acid	10293.5	10602.9	12767.3	9973.24	10952.7	9470.57	4820.35	6336.72	4454.61	4474.46	4751.91	8670.03
cis-Aconitic acid	1.3855e+06	2.11416e+06	1.61094e+06	1.2978e+06	1.38316e+06	1.65711e+06	1.68588e+06	864813	1.16025e+06	930094	1.46966e+06	1.65892e+06
Citramalic acid	356334	425345	334513	298790	380418	435480	471861	486945	566619	574273	466437	481817
Citric acid	4.8841e+07	3.41743e+06	3.49687e+06	3.45805e+06	3.6851e+06	3.05757e+06	3.47768e+06	3.85165e+07	3.21203e+06	3.274e+06	3.50176e+06	3.58902e+06
CoA	5880.01	704.094	4496.17	3318.66	2725.05	2409.47	7402.61	6347.77	6536.73	5826.11	5947.54	5647.28
Creatine	175585	248865	217545	220293	159892	191986	185232	253623	197815	199528	236385	170673
Creatine phosphate	302.437	137.261	213.607	280.871	351.482	336.91	213.719	262.392	250.142	253.273	217.912	378.015
Creatinine	3543.84	3959.61	3048.36	2902.78	1971.72	3028.53	4542.73	5230.4	6379.9	4177.38	3249.93	3491.19
Cysteine	18452.6	5581.57	11165.9	16789.7	18524.8	17071.1	26938.7	4713.08	21934.3	31168.3	24593.8	22056.3
Cytidine	52.3504	43.7251	94.5894	27.0503	61.3258	67.9202	146.98	515.623	21.8221	41.5709	171.378	56.7457
Cytidine 5-diphosphate	1054.85	136.187	465.507	1472.36	149.307	1174.11	908.266	493.689	44.2501	956.163	119.154	91.6763
Cytidine 5-triphosphate	8979.3	12099.5	6099.14	5601.53	3057.87	3622.99	11099	6858.57	6200.02	4643.01	9166.83	8344.62
Cytidine-5-monophosphate	137255	92640.5	139803	106976	80980.6	59290	282344	310237	215119	194368	269948	168529
Cytosine	17.4166	46.9673	42.4081	95.7307	27.1667	133.623	55.3767	42.7838	32.7796	106.59	78.1699	131.404
D-+-Galactosamine	25.6648	14.1565	22.359	17.41	28.2107	31.8911	17.6697	94.4867	37.4728	54.845	32.8116	17.4534
Deoxyadenosine 5-triphosphate	589.029	1671.69	1038.56	1431.23	881.926	1184.96	2635.07	3118.97	1229.38	942.938	3962.05	995.098
Deoxycytidine 5-triphosphate	30.529	7.70393	48.6995	18.5301	35.7079	134.9	0.784298	10.6874	29.712	5.44636	58.6402	13.8577
Deoxyguanosine 5-triphosphate	3.40686e+06	3.86939e+06	2.94126e+06	2.49544e+06	2.03038e+06	2.37537e+06	2.87772e+06	2.90256e+06	2.86208e+06	2.5057e+06	2.9569e+06	2.64506e+06
Deoxythymidine 5-triphosphate	76166.9	98397.5	50373.8	41549.5	28456.2	29579.3	100093	64669.8	47915.2	36199.6	76524.7	72947.4
D-erythro-Dihydrosphingosine	134332	6575.2	5501.3	3193.75	135298	6294.05	6214.71	117402	9669.14	7321.78	4383.06	4085.29
D-Fructose 1,6-biphosphate	228168	239132	162253	87559.2	136476	107300	210511	67786.2	196285	183785	138866	114969
D-Fructose 6-phosphate	1.07616e+06	2.99027e+06	760584	723843	1.38971e+06	1.5793e+06	288554	279022	546942	488970	581022	651564
D-Gluconic acid	467892	497090	510290	668884	527052	516895	1.12191e+06	726535	804437	786509	1.22269e+06	1.13833e+06
D-Glucosamine 6-phosphate	369.508	172.177	629.075	632.777	882.879	1036.86	336.98	287.095	192.925	449.365	587.312	976.479
D-Glucose 6-phosphate	1.05345e+06	1.10629e+06	1.38846e+06	1.44718e+06	1.40696e+06	1.82121e+06	313229	134488	407414	615433	331999	919778
Dihydroxyacetone phosphate	39272.8	125040	83152.3	58591	79645.9	40469.8	28128.9	2.05237e+06	45373.3	60659.5	40115.7	51039.4
DL-2-Aminoadipic acid	245997	290359	195709	206456	240440	237639	334497	228586	202971	194223	304883	268261
DL-Glyceraldehyde 3-phosphate	39272.8	125040	83152.3	58591	79645.9	40469.8	28128.9	2.05237e+06	45373.3	60659.5	40115.7	51039.4
DL-Isocitric acid	4.8841e+07	3.41743e+06	3.49687e+06	3.45805e+06	3.6851e+06	3.05757e+06	3.47768e+06	3.85165e+07	3.21203e+06	3.274e+06	3.50176e+06	3.58902e+06
D-Maltose	2230.82	1520.29	3718.03	2013.73	1443.3	2625.75	776.787	802.608	907.169	839.539	251.536	2174.89
D-Mannose	13633.4	62723.3	24757.2	10048.5	14566.4	18651.7	7744.52	1876.85	5845.42	3421.96	6635.12	19274.4
D-pantothenic acid	499149	527072	667134	551927	458244	485890	2.77095e+06	1.88161e+06	2.08264e+06	1.96445e+06	2.78927e+06	3.07355e+06
D-Ribose 5-phosphate	270118	297976	274857	270890	343516	287992	359115	252185	386080	358919	290680	334720
D-Ribulose 1,5-biphosphate	18198.3	1526.84	8335.49	2587.8	5769.35	11685.3	16245.2	10702.2	4834.26	1630.57	9117.64	20039.4
D-Sedoheptulose-7-phosphate	457492	580253	511766	295705	772963	773264	159050	11344.2	269859	182391	114990	347768
D-Xylose	9606.13	16274.1	9411.8	11669.8	11461.1	11871.3	9364.72	10136.5	10024.1	6918.73	7302.28	7466.37
D-Xylulose-5-phosphate	269571	298543	274240	269516	305813	288522	341208	254526	313237	326635	292036	335038
Epicatechin	6179.11	9542.4	5262.17	3313.7	5366.78	7855.3	5894.29	4030.05	5359.38	4295.94	3339.44	3749.23
Flavin adenine dinucleotide	1292.23	1644.27	1411.7	805.396	805.503	763.685	1016.01	611.586	871.985	736.901	925.019	1034.08
Folinic acid	23.6708	30.9146	0.883322	0.783343	0.967812	0.530845	0.6519	0.717969	11.457	0.968548	1.22342	0.947115
Galactonic acid	122894	131899	125733	131183	124898	134781	234386	186496	220572	203354	214221	210230
gamma-Aminobutyric acid	90.4454	43.6023	30.2486	3.29445	33.6828	43.4806	21.8201	15.8383	16.0683	53.4481	15.0641	23.7357
gamma-Glu-Cys	5.78105	12.5632	8.48429	5.95721	1556.07	1561.02	17.58	49.5681	16.9321	44.2515	11.4971	1336.54
Glucoheptonic acid	509.346	1844.78	3039.93	2947.52	186.528	2363.97	3269.33	3655.55	3178.69	2127.41	2139.81	2275.09
Glutathone red	5.83157e+06	2.1538e+06	6.45596e+06	5.65489e+06	6.16074e+06	6.15028e+06	6.90466e+06	6.35333e+06	6.7555e+06	6.86706e+06	6.54626e+06	7.03171e+06
Glyceric acid	14285.8	23618.7	15589.4	27508.5	11459.4	13673.7	28610.6	31644.2	25857	27347.8	35157	11848.5
Glyoxylic acid	61.8537	160.607	256.958	1105.97	215.086	49.8363	288.609	757.305	409.143	67.912	30.1631	299.255
Guanine	184.603	101.545	15.0333	22.0722	26.57	39.2847	306.189	1303.75	16.1118	155.032	110.458	28.6142
Guanosine	142444	124545	72209.8	45958.8	137418	77060.7	43031.4	288851	75466.8	105045	63851.2	30068.8
Guanosine 3,5-cyclic monophosphate	6.91842	13.8655	8.60095	41.3319	0.323376	5.67679	6.91768	7.84601	101.738	15.7078	33.2217	18.5035
Guanosine 5-diphosphate	1443.63	124.087	62.7474	1134.38	1204.73	64.7463	56.2584	841.665	42.2404	1417.44	69.5113	1889.13
Guanosine 5-triphosphate	12314.7	27103.4	9542.93	8656.93	6836.4	7625.16	6649.65	9286.49	8060.68	9244.7	9808.59	2356.33
Homocitrate	11800.6	13117.5	4175.12	5816.41	6830.41	5006.62	8143.56	6463.05	7124.94	5784.85	5482.64	5785.62
Hypoxanthine	482774	306985	159963	34402.3	357864	132408	106839	71610.3	166471	191162	73839.5	131240
Indoline-2-carboxylate	404.405	117.799	227.789	116.385	318.236	95.2327	250.122	236.959	86.6337	167.656	513.031	217.281
Inosine	3.66734e+06	3.466e+06	2.02231e+06	716480	2.88508e+06	1.73327e+06	1.22699e+06	5.4654e+06	2.41791e+06	2.79632e+06	1.67487e+06	1.76094e+06
Inosine 5-diphosphate	39.1373	88.4642	16.3693	5.6832	68.1013	18.2958	19.7493	611.553	13.5972	65.8363	30.6212	38.9833
Inosine 5-monophosphate	35277.4	39967.6	56603.7	24462.6	31959.6	21767.4	49222.1	63064.9	47271.9	51211.3	55204.2	39437.1
Inosine 5-triphosphate	186507	206528	154525	131994	105822	123493	157020	150308	152653	134215	151878	139518
Isopentenyl pyrophosphate	33.0145	11.7252	148.195	113.719	111.004	87.1725	170.007	147.673	83.5171	15.5595	58.2733	84.8851
Isopentyl acetate	427385	571873	323867	292839	387641	250597	429815	338924	422061	388787	479143	305061
Itaconic acid	424715	570613	324001	293825	391817	324570	428713	323806	422500	388765	478198	396820
Ketoisovaleric acid	535.883	619.907	463.86	440.166	192.058	217.604	984.623	379.416	852.75	82.1368	1678.95	507.803
Ketovaleric acid	581340	517285	572664	511725	531160	560229	572413	433783	420104	435929	508020	577620
Lactic acid	3.63488e+06	3.9219e+06	3.6904e+06	3.56029e+06	3.77001e+06	3.89001e+06	3.59074e+06	3.38287e+06	3.62368e+06	3.66693e+06	3.56199e+06	3.57229e+06
L-Arabinose	10623.9	15622.8	9411.8	11691.3	11774.3	11871.3	9342.73	8363.58	10303.3	6928.34	7602.75	8239.81
L-Arabitol	1565.51	2041.22	2310.14	1253.72	2265.9	1023.57	1991.95	2195.91	3254.69	3438.11	3233.35	3270.32
L-Arginine	12161.4	12086.1	15284.8	11662.2	17705.3	20846.9	14416.7	14175	16435.7	15644.3	11724.2	12408.4
L-asparagine	9062.23	8680.82	6987.16	1041.79	15583.7	20933.9	9988.63	11755.6	18761.2	21183.5	10200.4	10603.2
L-Aspartic Acid	5.38133e+06	4.53597e+06	5.94377e+06	4.95572e+06	4.46692e+06	4.76752e+06	3.50898e+06	2.45159e+06	2.30286e+06	2.01564e+06	2.95217e+06	3.81195e+06
L-Canavanine	27.5243	113.97	28.6406	25.7692	60.099	43.2843	37.6206	44.0435	17.9236	34.9022	25.3945	38.3349
L-Carnitine	25146.4	21390.6	21173.7	20754.3	21565.7	20947.7	24527.5	27114.6	26444.8	26161.9	20729.4	18827
L-Citrulline	43839.4	41974.6	31217.7	28577.4	43333.1	32413.7	76733.9	86095.1	102782	95179.3	91828.6	83264
L-Cystathionine	1033.14	1186.31	715.653	553.551	1023.66	712.923	1780.37	1751.57	1825.64	1815.63	1598	1815.95
L-Cystine	1324.16	359.899	777.246	971.557	2814.53	2734.24	2274.58	618.584	3556.3	5134.4	2961.58	2728.4
L-Dihydroorotic acid	45342.6	55383.7	83896.5	85948.3	56360.3	69225.9	70262.7	55841.2	27697.8	29486.7	89559.9	62890.7
L-Glutamic acid	5.60259e+06	5.58348e+06	6.61732e+06	5.64182e+06	1.14839e+07	6.72928e+06	1.08527e+07	4.89935e+06	1.02816e+07	9.99988e+06	4.90658e+06	6.44518e+06
L-Glutamine	48186.6	50109.9	69860.6	67119.9	27096.7	47492.5	34227.2	15765.7	36562.5	36664.2	39042	53274.7
L-Gluthathione (oxidized)	1.69122e+06	1.50585e+06	1.77197e+06	1.73376e+06	1.85598e+06	1.97299e+06	1.5215e+06	1.37352e+06	1.45417e+06	1.38632e+06	1.35879e+06	1.68877e+06
L-Histidine	34861.8	37260.6	34090.2	28264.8	26846.3	28939.1	57447.8	58137.7	63384.2	63584.7	57855.9	53099.3
L-Homocysteine	16.4993	95.8087	31.5455	18.5764	7.73392	29.4019	20.8317	36.2764	10.6229	49.8355	26.2455	34.7103
L-Homocystine	36.1627	19.6004	17.2774	84.8943	16.8546	61.4697	26.7748	12.2384	11.5655	143.666	103.241	106.934
L-Homoserine	269.534	88.3916	34.7067	168.323	371.029	423.316	616.938	80.4881	357.233	414.129	307.602	145.431
L-Hydroxyglutaric acid	1.12278e+06	1.32896e+06	1.08098e+06	978482	1.20805e+06	1.44369e+06	1.553e+06	1.5591e+06	1.81849e+06	1.85423e+06	1.57011e+06	1.56581e+06
Lipoamide	27.1675	445.448	48.1083	4.41956	31.9768	25.5283	1039.95	1533.3	1754.41	1966.31	1516.14	845.349
L-Isoleucine	6503.25	7511.44	6686.68	5149.63	5345.41	8161.4	3831.11	4566.82	6833.43	7750.3	7238.08	8617.8
L-Kynurenine	68828.6	117397	102560	69545.8	61824.7	72224.1	65333.7	49437.4	59009.8	52928.8	46596	64799.5
L-Leucine	6503.25	7511.44	6686.68	5149.63	5345.41	8161.4	3831.11	4566.82	6833.43	7750.3	7238.08	8617.8
L-Malic acid	3.05015e+07	2.89453e+07	2.91897e+07	2.46569e+07	2.64386e+07	2.63485e+07	3.08257e+07	2.28009e+07	2.33833e+07	2.15263e+07	2.69348e+07	3.15577e+07
L-Methionine	284644	320353	329902	279047	518151	524727	474757	433341	620720	633872	404725	396360
L-Phenylalanine	883751	1.09397e+06	846816	815234	1.53241e+06	1.44295e+06	1.00917e+06	1.27899e+06	1.55173e+06	1.72981e+06	1.28366e+06	1.31554e+06
L-Proline	3895.28	6367.88	4065.72	4499.31	3988.63	6693.78	4752.35	5887.45	8211.34	7550.91	4395.31	4802.29
L-Serine	24041.9	23978.7	20875.3	17469.3	24883.7	28351.4	10954.1	13006.7	22876.8	22026.8	12371	15182.8
L-Sorbose	57458.8	79771.3	30812	37536.7	52064.8	41839.8	18981.9	16159.3	12484.7	3838.84	20429.4	33909.9
L-Threonine	122589	149349	175066	162498	294178	296726	244723	272446	334336	364698	254216	269872
L-Tryptophan	405324	500429	481187	442915	561948	581579	889040	662887	761463	751226	918445	982365
L-Tyrosine	413675	497006	370338	333106	434732	483427	506369	383819	481194	466620	489958	415128
Maleic acid	24912.4	4872.76	13998.8	18182.5	3325.14	36228.7	36585.7	8156.21	28399.1	30078.1	8413.08	19411.5
Malonic acid	86301.3	77658.3	91494.6	81154.2	94850.2	85852	88989.8	86709.7	88897.9	84731.4	82004.2	90567.8
Melibiose	200.969	405.928	83.3877	220.683	176.903	120.311	145.997	45.0026	32.8614	5.08468	19.2856	20.491
Mevalonic acid	1705	2662.85	1874.04	1358.1	2105.76	1683.34	1963.28	1067.68	943.999	1101.7	1594.15	2952.41
Mevalonic acid 5-phosphate	9042.5	39191.3	37250.5	46091.4	2847.04	29756	2964.82	21824.5	26329.8	46949.8	18978.6	38359.7
m-Hydroxybenzoic acid	342.39	353.152	442.873	431.863	182.719	212.287	168.435	174.696	205.904	314.525	393.759	206.329
myo-Inositol	716387	754550	485208	483038	443718	481756	217837	247084	295291	145405	239244	408948
N-Acetyl D-galactosamine	216.554	388.754	322.27	551.316	264.988	520.854	244.181	665.215	669.146	750.169	278.49	364.822
N-Acetyl-alpha-D-glucosamine 1-phosphate	597223	859108	734228	642628	727153	947639	572165	213072	585551	505822	462811	720511
N-acetylaspartate	2.36654e+06	2.68315e+06	3.15078e+06	2.19731e+06	2.33879e+06	2.64132e+06	2.17026e+06	1.62076e+06	1.89574e+06	1.74416e+06	1.63299e+06	2.10874e+06
N-acetylaspartylglutamate	351844	355969	421586	190959	276783	356924	224132	132099	213436	226185	196799	247549
N-Acetyl-D-glucosamine 6-phosphate	751188	818408	583902	392268	747124	707952	601098	711831	1.15972e+06	1.01869e+06	570618	534632
N-Acetylglutamic acid	199747	236024	214527	167168	224905	254959	247049	245412	266564	273154	208446	222799
N-Acetylneuraminic acid	282547	333326	298270	244383	344361	343991	473881	267220	591806	609659	473939	298116
N-Carbamoyl-DL-aspartic acid	938883	1.17794e+06	813907	998669	828580	972997	1.12118e+06	578741	462452	481603	841329	842206
N-Carbamyl-L-glutamic acid	12670.6	14307.7	14932.9	13590.4	11775.8	14662.8	21969.8	22271.3	23095.1	22700.3	18979.1	16462
N-Formyl-L-Tyrosine	2793.01	720.924	2295.65	1139.37	1784.67	1742.79	1500.07	2356.45	5813.93	2062.92	1294.82	3894.37
Nicotinic acid	476.555	651.3	1225.95	516.535	755.902	873.144	413.215	1020.08	741.438	663.729	569.811	458.592
Nicotinic acid mononucleotide	86.7082	62.9605	63.1404	44.861	1344.09	117.066	123.83	57.028	90.2872	109.842	58.2648	141.294
o-Hydroxy hippuric acid	1083.1	1857.89	575.934	653.055	1809.95	3988.05	2068.25	354.777	1674.44	784.963	395.254	127.77
o-Phospho-L-Serine	51.9414	58.7202	61.3896	40.6052	25.6747	24.7988	11.6738	6.69776	22.4793	5.6561	26.8208	9.87532
O-Phosphorylethanolamine	1.8491e+06	1.68312e+06	2.07202e+06	1.92166e+06	1.66413e+06	2.00425e+06	1.94823e+06	1.63051e+06	2.30298e+06	2.15688e+06	1.95885e+06	1.95472e+06
Orotic acid	11911.8	15485.3	15269.3	14871.8	9739.9	13659.5	11453.7	19157.1	12190.9	12381.1	18505.4	13191.2
O-Succinyl-L-homoserine	118.957	113.046	153.868	184.659	485.576	343.791	257.98	187.993	416.764	477.311	54.6628	131.644
Oxamic acid	179.093	357.627	394.389	384.897	577.815	721.36	47.5575	138.222	448.891	91.1861	483.409	325.369
Phenylpyruvic acid	3155.1	3442.62	3055.34	3289.56	7829.95	6127.05	3126.68	4645.24	1664.18	3982.77	6457.07	4877.58
Phosphoenolpyruvic acid	176063	186266	234835	189744	18780.8	44399.6	197759	5729.49	145487	112145	147638	60851.4
Prephenic acid	93.7203	15.2377	52.5394	150.528	28.2178	11.9471	36.0703	72.8986	27.3797	126.446	21.2013	28.8842
Pyridoxal 5 phosphate	8110.55	8204.12	5941.36	6857.33	7068.24	8307.71	3539.14	783.498	6785.28	5546.04	1477.59	5478.2
Pyridoxal hydrochloride	99.5882	432.374	185.933	775.37	1984.95	1522.5	2078.39	5105.84	4309.25	4239.13	392.815	4291.41
Pyridoxamine	23.3941	33.0645	15.6834	25.3125	47.615	27.1162	15.8073	27.4835	20.3914	30.8846	16.884	27.342
Pyridoxine	29.2688	8.53358	10.3705	41.7537	6.91852	10.8006	22.9985	9.45013	54.4773	21.9177	39.7009	29.1841
Pyruvic acid	10945.8	6472.34	15939.8	16357.7	3720.92	5318.57	20926.8	179678	19764.4	8862.19	22267.6	2955.33
Quinic acid	3156.71	5959.37	198.017	2490.13	3829.04	3670.32	1450.22	3500.2	719.619	813.799	820.117	2688.27
Remove	5.8439	11.6928	7.79424	4.25085	9.43646	6.45717	11.0522	1.48186	2.14894	5.51775	7.19572	10.4699
Riboflavin	3856.05	5273.11	2985.39	2801.11	2651.29	2752.3	2875.46	2754.53	3322.63	3052.95	2568.28	3773.85
Ribonic acid gamma lactone	972.891	365.126	65.1502	404.602	162.272	574.588	190.823	566.312	291.61	459.477	158.369	351.145
S-2-Aminoethyl-L-cysteine	0.488718	0.495309	2.03151	0.979663	0.0878107	0.23314	1.14064	36.9665	0.521184	0.415712	0.505821	0.182608
S-5-Adenosyl-L-homocysteine	8928.95	7546.93	9291.76	8806.27	10941.7	7998.16	15301.4	13740.3	8916.93	8935.39	13383.6	605.527
Salicylic acid	24407.8	30032.6	21512.3	26037.4	41305.9	41673.3	15121.6	13059.6	16092.7	16531.9	17483.6	18542.2
Shikimic acid	15460.6	15068	20790.6	13654.4	22019.1	22702.1	18358	11383.6	2251.34	27306.1	16266	7660.23
Succinic acid	2.27061e+07	2.31778e+07	2.50258e+07	2.26339e+07	2.37447e+07	2.26621e+07	2.93074e+07	2.5973e+07	2.56802e+07	2.59386e+07	3.00629e+07	3.1315e+07
Succinic semialdehyde	1105.75	98.3334	88.7519	1849.78	10549.5	141.138	162.757	143.887	145.328	269.932	211.94	2687.14
Taurine	3.11153e+06	4.14239e+06	3.2148e+06	2.98385e+06	3.62157e+06	3.36218e+06	3.10159e+06	2.89837e+06	3.14842e+06	3.19672e+06	3.10803e+06	3.29019e+06
Taurocholic acid	10489.4	14257.6	80669.8	42313	8774.61	8122.9	30795.9	15453.7	89852.8	85972.7	49274.8	36876.1
Thiamine	266.755	137.088	566.083	547.112	687.851	716.025	744.111	796.024	794.529	647.077	337.334	462.198
Thymidine	10317.2	11634	11003.9	8937.49	11473	9491.01	14873.9	9583.88	14351.4	12234.6	10034.9	13864.3
Thymidine 5-diphosphate	11776.8	10479.9	13812.7	6945.15	9010.43	11337.6	7423.34	5158.14	7467.94	7169.88	6373.31	7839.65
Thymine	274.642	94.9236	735.426	587.257	485.252	483.525	453.765	339.139	502.426	1001.29	370.866	482.146
trans-4-Hydroxy-L-proline	8981.8	10625.1	12446	15622.7	18399.7	13663.8	18757.9	19296.6	20731.6	17901.9	14909.4	13772.3
trans-Aconitic acid	1.37275e+06	2.14553e+06	1.61725e+06	1.29497e+06	1.38775e+06	1.6573e+06	1.68588e+06	844215	1.17723e+06	929676	1.45402e+06	1.63813e+06
trans-trans Muconic acid	17.7683	23.3252	12.9361	7.31167	5.96334	18.9652	16.9843	17.656	4.05615	22.3036	26.5183	26.3778
Trehalose	4639.66	8274.16	4566.31	2297.77	2555.84	1796.62	7648.43	1668.4	3680.09	2560.19	1697.11	2629.45
Trehalose 6-phosphate	27.0432	7.72698	78.3983	78.0309	22.411	237.68	80.2526	5.08463	18.011	29.8998	15.973	51.8376
Uracil	76224.4	59522.6	49288.8	50342	60580.8	30683.4	70841	71750.8	58637.2	76195.6	77310.6	60488.7
Uric acid	661130	801900	657945	592377	401565	392038	570450	402849	592819	615019	578292	539431
Uridine	1.12555e+06	964977	603645	176646	1.05299e+06	549037	616849	844231	633441	656998	445317	489035
Uridine 5′-diphosphogalactose	3.95256e+06	4.0374e+06	3.74787e+06	3.13958e+06	3.69334e+06	3.70454e+06	4.28133e+06	3.3458e+06	3.39271e+06	3.10939e+06	3.86366e+06	4.1086e+06
Uridine 5-diphosphate	140216	149008	144949	124307	120046	80265.6	202207	229124	156544	169822	177852	127382
Uridine 5-diphosphoglucose	3.95256e+06	4.0374e+06	3.74787e+06	3.13958e+06	3.69334e+06	3.70454e+06	4.28133e+06	3.3458e+06	3.39271e+06	3.10939e+06	3.86366e+06	4.1086e+06
Uridine 5-monophosphate	319819	479443	604728	379405	590350	402351	630423	813524	390986	563792	702038	583320
Uridine 5-triphosphate	2.67925e+06	3.1558e+06	1.90015e+06	1.5601e+06	1.18509e+06	1.22424e+06	2.47853e+06	2.47576e+06	1.70667e+06	1.35657e+06	2.12735e+06	1.87882e+06
Vanillic acid	416.319	323.581	1306.2	1008.36	774.801	105.481	3274.88	815.743	396.422	2883.67	291.756	463.124
Xanthine	892506	766228	478241	280397	731937	370381	499445	630936	710719	745170	307964	446840
Xanthosine	49574.2	48268.9	37328.1	37885.3	39503.9	37233.3	103837	68811.4	82629.8	77216.8	71277.5	62024.6
Xylitol	1565.51	2041.22	2310.14	1253.72	2265.9	1023.57	1991.95	2195.91	3254.69	3438.11	3233.35	3270.32

## Sheet: hCAF CM
Metabolite	DMEM rep1	DMEM rep2	DMEM rep3	2mM Pyr rep1	2mM Pyr rep2	2mM Pyr rep3	hCAF CM batch1 rep1	hCAF CM batch1 rep2	hCAF CM batch1 rep3	hCAF CM batch2 rep1	hCAF CM batch2 rep2	hCAF CM batch2 rep3	hCAF CM batch3 rep1	hCAF CM batch3 rep2	hCAF CM batch3 rep3
±-Mevalonolactone	22.2071	43.1065	38.9671	27.0291	26.4564	12.6242	75.0183	59.7158	18.3125	194.033	114.115	41.6843	9.89279	48.3966	7.91301
2-2-Dimethyl Succinic acid	37979.4	58025.9	56540.2	10793.9	14725.1	8451.05	1.38902e+06	1.42576e+06	211132	167279	170602	171208	1.13844e+06	74720.4	65534.9
2-3-Dihydroxybenzoic acid	3903.99	678.838	436.488	289.044	419.242	676.098	466.499	449.803	349.925	92.2012	123.602	205.81	654.951	159.02	83.3979
2-3-Dihydroxyisovalerate	1726	171.618	1233.26	1431.66	577.366	676.524	550.725	194.147	713.482	353.557	251.823	293.112	695.295	243.126	609.676
2-3-Pyridinedicarboxylic acid	195541	193968	191904	34341.7	32694.1	36582.1	136176	62859.5	140599	119080	87996.4	40224.1	126166	90651.1	98261.7
2-4-Quinolinediol	117.532	9.2698	21.9715	57.7126	91.343	64.5632	30.0558	166.407	70.3412	14.6899	87.7115	63.8134	128.482	57.5275	57.2208
2-Deoxyadenosine	1243.85	1774.28	2234.79	1591.04	2667.06	1470.87	16411.9	8106.54	2579.65	4756.93	2041.8	4931.73	10610	1284.59	2908.49
2-Deoxyadenosine 5-diphosphate	35.0511	11.5224	0.523511	19.245	43.6797	25.2088	12.3816	15.0216	28.9315	22.4802	34.9405	26.5814	9.79504	0.278265	21.1136
2-Deoxyadenosine 5-monophosphate	28.3779	16.9276	19.836	23.3798	97.8163	37.5363	159.275	14.4096	54.3184	37.6135	26.4382	79.6217	14.2537	54.1717	22.072
2-Deoxycytidine	3928.06	204.877	670.02	2476.66	2785.17	427.81	5980.02	7292.04	8091.35	6104.57	6664.15	8411.26	5051.5	635.893	348.641
2-Deoxycytidine 5-diphosphate	19.4839	56.3884	22.2823	14.322	19.0762	79.0016	30.6031	9.23085	32.3875	51.2412	94.34	45.229	68.1289	19.8087	27.1507
2-Deoxycytidine 5-monophosphate	29.9774	10.5837	7.39284	7.00434	24.4339	5.37332	6.31235	14.6378	5.36229	14.3762	21.3693	43.8799	13.4156	11.1256	9.16222
2-Deoxy-D-glucose 6-phosphate	61.6412	149.954	38.3389	37.5438	37.9628	26.7465	106.46	25.5288	78.3723	43.1572	66.6498	152.22	61.0813	28.3536	39.8334
2-Deoxy-D-ribose	125.095	1741.08	7916.95	4093.32	1806.77	10541.4	9605.78	1012.11	4189.02	5964.77	3351.32	3468.82	7387.81	8724.79	3252.82
2-Deoxyguanosine	5.94599	8.13055	73.1633	5.56707	5.19854	19.5769	27.0329	17.6324	2.12057	14.1541	6.46963	5.76178	11.9524	4.5855	4.5973
2-Deoxyguanosine 5-diphosphate	37.5539	35.504	14.5335	108.469	67.8406	12.67	20.5013	30.2335	16.7477	111.709	19.8449	13.0874	12.6306	124.824	10.9071
2-Deoxyguanosine 5-monophosphate	54.3673	112.208	101.638	29.3051	199.171	43.2605	668.352	518.791	578.573	185.167	519.466	126.445	464.022	511.211	223.672
2-Deoxyinosine	26.2343	12.6785	25.9314	15.9867	35.384	22.5706	1015.51	154.256	554.094	2296.58	2373.13	1391.32	965.998	342.192	816.98
2-Deoxyribose 5-phosphate	389.212	185.924	79.852	29.8469	53.7527	28.8635	53.7356	53.3464	69.3863	59.7607	59.69	204.941	51.9856	34.72	101.344
2-Deoxyuridine	6519.72	6620.79	6782.04	1473.61	7641.56	1809.33	220028	216692	221065	270670	265551	261147	64536.9	64010.5	61751.4
2-Deoxyuridine 5-triphosphate	21.4996	10.1553	20.2294	7.8428	6.94955	2.75575	7.56903	13.7273	26.7972	27.7417	10.739	29.1347	14.6578	7.36548	9.49482
2-Isopropylmalic acid	8366.14	1987.4	1748.25	4.6918e+06	4.45187e+06	4.25664e+06	776529	655090	439409	256935	281711	274514	768002	809725	459893
2-Ketobutyrate	2957.11	9135.25	2482.76	1535.44	3816.61	2074.15	5947.52	3785.22	10989.3	1210	3087.29	8835.01	6020.01	150.49	1749.86
2-Methyl-1-butanol	17637.5	18365.4	18480.6	6.02198e+06	2.40797e+06	5.29678e+06	2.59619e+06	2.88382e+06	2.87164e+06	2.1713e+06	2.12478e+06	2.08618e+06	3.08214e+06	2.75666e+06	3.07004e+06
2-Phosphoglyceric acid	364.46	270.232	619.682	107.732	1424.56	87.4278	51.3273	219.768	190.467	202.418	215.528	149.742	107.29	73.7706	36.2682
3-2-Hydroxyethylindole	44.7743	19.1751	20.1257	19.461	10.7007	20.0188	36.9146	13.3105	15.7404	16.5182	19.8181	25.786	9.41397	36.1346	9.90432
3-Dehydroshikimic acid	2569.36	1423.16	94.8311	184.167	141.951	151.657	3164.82	210.079	104.473	130.986	83.0899	280.857	603.501	837.317	154.376
3-Hydroxyanthranilic acid	168.72	72.5396	116.92	138.435	3092.08	222.565	43.2457	58.8262	102.414	656.379	131.177	68.809	411.209	45.9962	46.8946
3-Hydroxy-DL-kynurenine	30.2481	15.3115	57.9258	12.9136	57.5804	42.3035	1.56992	35.9342	9.88321	15.9754	26.9378	5.58472	14.6357	17.0502	27.345
3-Hydroxyphenylacetic acid	106.957	63.737	1106.99	2018.55	2004.54	2030.48	99.0842	2017.48	1536.18	157.398	133.824	71.1655	34.9331	2370.62	17.149
3-Indoleacetic acid	567.301	509.825	920.269	286.466	556.276	811.682	286.62	603.632	535.345	415.55	3437.61	3155.43	306.817	239.768	763.318
3-Methylglutaric acid	293562	323136	325301	170849	169260	105739	1.38902e+06	1.40919e+06	1.48431e+06	1.98308e+06	2.07883e+06	2.08985e+06	1.18929e+06	1.13121e+06	1.21508e+06
4-Aminobenzoic acid	24.2632	11.013	15.2471	14.2075	14.7032	6.82027	25.99	15.2623	7.56848	36.6372	14.6367	53.1946	8.69165	41.9347	32.2303
4-Guanidobutyric acid	10.8561	1.44688	38.4282	28.4062	15.0581	50.6046	0.844254	12.2893	16.9377	22.8023	35.1348	19.2823	19.1742	12.8003	11.1707
4-Hydroxybenzoic acid	253.917	96.3757	173.968	71.8977	204.507	60.2386	225.106	273.971	48.9197	100.723	61.007	258.412	430.434	327.051	29.1843
4-Hydroxy-L-glutamic acid	8415.05	1044.19	998.881	546.049	367.365	1474.54	41.2621	7989.66	3992.01	622.297	150.623	1695.62	2840.7	1701.93	11628.5
4-Hydroxyphenyl-pyruvic acid	228.308	30.7345	50.3126	479.474	875.215	527.31	927.064	2134.31	1281.01	1996.48	1966.17	2179.01	1224.38	290.81	363.275
4-Methyl-2-oxovaleric acid	153376	176924	162245	569906	597301	587035	114583	114291	103569	120635	113781	110012	139687	172329	134333
4-Pyridoxic acid	134551	66573.4	130989	56859.5	50445.1	60178.3	67031.7	129546	65671.5	56201.4	49506.5	48538.8	67133.5	62817.7	54759.7
4-Quinolinol	54.8782	9.53229	31.1458	11.5782	17.1961	13.3305	15.3242	11.9797	13.4122	7.578	6.81882	7.36517	14.7191	16.9879	6.72101
5-Deoxy-5-(methylthio)adenosine	16.4448	12.8027	19.6585	78.441	5.44574	10.3016	44.8347	169.725	162.527	98.911	24.9101	61.631	144.44	136.196	37.9172
5-Hydroxy-3-indoleacetic acid	8.87857	114.565	215.077	7503.01	5655.07	6130.39	8883.38	1411.2	4442.61	493.974	1731.05	1544.88	2986.66	1566.08	2854.51
5-Methoxytryptamine	13.9016	8.01403	10.8165	3.41506	7.23789	10.2656	0.743033	10.2391	0.385094	20.6637	0.526391	10.6179	18.7565	15.1583	1.89467
6-Hydroxynicotinic acid	79.3476	266.86	125.243	51.4661	193.978	54.3668	140.519	164.537	120.191	165.635	86.4296	92.9392	29.0777	385.454	20.0084
Adenine	31.0882	18.9274	8.7975	70.9453	30.9726	13.5581	144.065	118.822	150.942	288.6	213.093	364.85	6.25983	39.813	74.8294
Adenosine	11.9674	3.43183	0.5812	8.55997	7.42847	11.3765	17.3836	10.2954	19.0096	13.7453	29.7347	10.159	7.30062	12.4461	12.7106
Adenosine 3-5-cyclic monophosphate	42.8917	35.4005	36.3151	31.906	43.7015	27.5931	103.62	17.6241	56.8375	10.7077	55.2504	17.5136	158.381	18.7342	38.651
Adenosine 5-diphosphate	15.0412	2.17991	19.425	24.2829	35.0662	14.7236	119.445	54.6731	41.0186	53.565	12.3022	37.8111	25.3282	18.7029	20.5598
Adenosine 5-monophosphate	54.3673	112.208	101.638	29.3051	199.171	43.2605	668.352	518.791	578.573	185.167	519.466	126.445	464.022	511.211	223.672
Adenosine 5-triphosphate	11320.2	2823.7	635.848	49.2573	21.0169	9.18764	37.4605	92.2086	84649.1	18051.6	2186.9	479.979	443.021	187.2	46.4474
Adenylosuccinic acid	17.0277	17.0628	32.445	0.520115	8.02853	14.3858	25.9699	9.67289	20.1872	23.2424	6.9751	23.0984	16.3548	13.3233	4.19377
Adipic acid	293562	323136	325301	170849	169260	105739	1.38902e+06	1.40919e+06	1.48431e+06	1.98308e+06	2.07883e+06	2.08985e+06	1.18929e+06	1.13121e+06	1.21508e+06
AICAR	74.4265	36.2515	343.274	44.7315	23.1392	32.8976	408.553	1907.04	2727.53	31.7991	37.469	62.7266	927.136	308.157	861.505
Allantoin	3981.07	2688.89	3388.19	2820.25	2377.55	1952.88	3153.52	2516.93	3960.77	1340.12	3517.3	1552.95	2148.95	2752.91	1639.09
alpha-D(+)Mannose 1-phosphate	80.8372	34.1767	126.895	24.8515	283.734	125.426	1122.59	1640.62	2259.62	1850.25	3477.59	2037.33	347.952	1049.89	716.749
alpha-D-Glucose-1-phosphate	148402	374826	376185	170967	363253	187618	45502.3	9213.07	33111.2	2216.63	2816.41	4414.6	97196.2	42811.2	17334.8
alpha-Ketoglutaric acid	293562	323136	325301	170849	169260	105739	1.38902e+06	1.40919e+06	1.48431e+06	1.98308e+06	2.07883e+06	2.08985e+06	1.18929e+06	1.13121e+06	1.21508e+06
Arabinose-5-phosphate	235.811	135.039	282.136	55.6608	188.822	76.8314	234.749	136.833	1368.58	507.691	503.125	159.066	143.19	233.655	48.4703
Argininosuccinic acid	10.2829	64.6838	18.2962	5.08203	28.3585	6.37112	92.7856	233.6	136.996	18.5652	42.8199	15.1155	157.711	110.191	136.683
beta-Nicotinamide adenine dinucleotide	48.8189	23.6572	7.09953	20.5619	4.18569	14.5949	16.1855	1.84372	12.6372	2.7028	2.92034	8.19278	12.4321	3.3624	2.35521
beta-Nicotinamide mononucleotide	212.806	5044.36	2201.09	2002.5	4245.47	268.408	3118.59	3897.47	2859.01	2667.89	1745.38	2146.71	148.404	2634.64	2488.05
Cellobiose	2448.73	5011.32	6177.82	5630.52	5779.03	4915.38	10612.5	12287.9	11594.2	9234.39	10374.5	8386.25	11735.7	12588.6	11374
Chorismic acid	1277.77	424.644	286.038	2144.33	555.223	3163.57	2351.16	14924.2	4477.32	2419.82	8445.78	21834.7	329.753	374.462	1246.39
cis-Aconitic acid	553693	463116	421260	427405	361771	363177	8.66905e+06	8.39528e+06	8.704e+06	1.03165e+07	9.99118e+06	4.56383e+06	2.60622e+06	2.52293e+06	2.44931e+06
Citramalic acid	378255	372166	361198	2.60607e+06	2.8912e+06	2.81018e+06	427665	400572	387155	443172	401850	394092	403636	458110	377384
Citric acid	4.47637e+06	3.97185e+06	3.52634e+06	1.00376e+06	899255	922503	4.10015e+06	4.34306e+06	4.53498e+06	4.65599e+06	8.45263e+07	4.29849e+06	2.95933e+06	2.64182e+06	3.04222e+07
CoA	0.410538	4.83721	0.253836	0.230627	3.15446	0.316715	0.489652	2.50154	0.138306	0.518845	0.931665	0.10035	0.155952	1.24278	0.531683
Creatine	177.474	78.0002	403.972	169.942	129.592	611.948	235.713	521.662	448.248	285.547	144.708	459.257	383.038	330.628	188.808
Creatine phosphate	564.739	834.45	2460.74	218.531	1556.57	1097.12	734.36	209.574	110.266	391.966	327.832	168.289	186.649	937.294	459.78
Creatinine	762.846	800.76	517.55	867.773	866.873	626.798	822.141	1629.88	560.838	1498.98	2483.74	2402.06	2010.3	1738.64	190.681
Cysteine	73.6735	75.1185	70.2797	94.1133	50.3512	156.99	83.9924	36.1557	27.234	96.9807	134.415	23.4168	139.345	112.609	106.109
Cytidine	926.581	518.174	494.269	545.336	1208.95	1666.22	203.561	340.135	42.4537	75.4096	125.499	103.452	20.0822	180.02	139.531
Cytidine 5-diphosphate	36.9968	27.0874	35.9569	21.6466	14.133	109.196	87.4555	133.422	42.2532	32.0034	27.986	131.04	59.5399	72.5103	14.0048
Cytidine 5-triphosphate	17.2901	11.8882	9.45041	15.8224	24.7487	1.21607	5.69199	16.8227	257.799	59.2046	55.0075	11.9069	8.02705	6.54385	0.376552
Cytidine-5-monophosphate	70.4303	30.3118	26.1278	22.3478	12.2342	6.20018	66.3089	7.29833	15.8035	58.852	18.953	20.2413	26.0094	55.0875	6.3383
Cytosine	42.7734	26.2511	39.9733	1.97529	7.43753	0.683256	28.1803	21.5209	9.99904	54.2531	16.379	29.5089	32.9879	39.9177	1.25272
D-+-Galactosamine	29.0602	76.583	18.1523	44.0199	49.2731	23.0543	67.3461	20.3474	26.7017	39.2785	8.15879	22.3908	35.3083	31.7561	11.3823
Deoxyadenosine 5-triphosphate	9.39899	4.97308	2.66623	1.94279	2.65626	2.69749	10.5935	8.33107	18.5948	11.0011	18.4846	3.07334	18.8405	12.3901	0.439646
Deoxycytidine 5-triphosphate	1.38656	20.2936	11.6816	8.43954	10.6973	14.7377	13.3098	1.98264	40.0865	15.1778	6.59995	0.202392	8.96333	13.5111	23.9747
Deoxyguanosine 5-triphosphate	9722.17	2823.7	635.848	49.2573	21.0169	9.18764	37.4605	28.1651	84649.1	18051.6	2186.9	479.979	443.021	187.2	46.4474
Deoxythymidine 5-triphosphate	12.3862	16.9811	5.71975	5.92352	51.2984	28.1811	6.51354	16.2493	124.358	26.5889	41.5896	5.69425	5.00687	49.8631	17.1484
D-erythro-Dihydrosphingosine	54.7656	32.3321	23.3098	128.859	413.706	217.008	482.758	256.974	332.468	180.972	162.448	89.0399	183.812	155.991	137.157
D-Fructose 1,6-biphosphate	75.4525	1428.64	1600.81	35.3126	25.939	28.9029	24680.9	27213.8	33969.2	9537.4	10536.6	10076.2	4409.4	5141.95	6490.34
D-Fructose 6-phosphate	8.9259	18.1663	20.1039	18.1577	49.3933	78.0522	678.808	1022.74	1481.92	2110.29	200.381	196.314	440.33	2122.23	3001.61
D-Gluconic acid	10348.3	147619	30336.6	19959.3	152274	141247	70049.4	345686	65834.6	292825	386463	367858	7581.47	6791.89	101983
D-Glucosamine 6-phosphate	32.4652	47.1868	11.4387	49.8137	29.6136	28.7467	61.3585	17.3476	71.3923	31.4338	119.945	63.4016	24.9439	33.5246	16.6923
D-Glucose 6-phosphate	66.8134	72.5426	177.49	24.8515	195.887	184.009	356.378	1139.13	1859.64	2452.78	296.894	507.832	1429.03	1719.26	966.693
Dihydroxyacetone phosphate	418.052	2379.55	2632.6	1381.57	37.2396	43.9464	169.132	69.1728	102.404	60.185	347.182	103.696	84.3362	34.4843	31.9742
DL-2-Aminoadipic acid	25347.2	6037.78	26318.4	26123.3	24471.1	24182.2	29746.4	16823.3	23206.2	36221.3	35273.7	35469.4	12923.4	16441.3	16621.6
DL-Glyceraldehyde 3-phosphate	117.682	785.824	2967.27	1358.85	316.615	43.9464	169.132	619.248	102.404	1170.51	1687.8	749.83	360.995	345.511	556.665
DL-Isocitric acid	4.47637e+06	3.97185e+06	3.52634e+06	1.00376e+06	899255	922503	4.10015e+06	4.34306e+06	4.53498e+06	4.65599e+06	8.45263e+07	4.29849e+06	2.95933e+06	2.64182e+06	3.04222e+07
D-Maltose	1011.56	697.063	1167.94	547.049	1438.74	1077.12	833.261	516.105	451.866	280.87	347.244	921.793	3348.96	1053.83	523.096
D-Mannose	393476	468565	559471	352751	474396	509248	104332	279915	246872	60966.9	163979	171109	262749	334610	293345
D-pantothenic acid	2.53781e+06	5.53517e+06	5.46854e+06	5.69569e+06	5.49386e+06	5.38201e+06	2.59456e+06	2.73819e+06	5.74409e+06	2.20817e+06	2.09985e+06	2.14957e+06	4.63335e+06	4.57179e+06	2.08992e+06
D-Ribose 5-phosphate	235.811	135.039	282.136	55.6608	188.822	76.8314	234.749	136.833	1368.58	507.691	503.125	159.066	143.19	233.655	48.4703
D-Ribulose 1,5-biphosphate	58.1611	193.688	119.905	108.419	18.5868	1123.02	366.274	113.433	304.628	205.115	155.281	131.713	67.2117	224.06	197.935
D-Sedoheptulose-7-phosphate	2180.7	1557.65	1574.28	965.11	753.246	625.026	389.937	40.4437	867.622	845.135	1717.02	817.059	140.825	91.084	279.32
D-Xylose	11126.4	13848.7	20173.2	30806.5	12787.4	23576.6	10335.3	7618.53	12161.6	10698.7	3970.23	14725.6	9030.24	12425.8	19352
D-Xylulose-5-phosphate	2463.02	206.319	584.455	55.4878	37.9769	29.6768	157.942	141.097	331.823	9029.55	270.367	1584.62	165.875	155.869	202.265
Epicatechin	168.921	61.2056	368.161	421.121	136.954	290.647	78.6789	133.977	191.22	102.254	838.09	123.915	498.726	427.115	246.972
Flavin adenine dinucleotide	0.399125	0.227365	0.191494	1.09774	0.115934	0.248619	8.05023	0.138095	12.2247	0.355989	0.119917	3.52166	0.738881	0.840643	0.516248
Folinic acid	1.14179	18.5691	0.48455	21.1204	0.348432	0.218749	0.553381	0.248693	0.884313	0.0520511	0.52616	0.185642	0.910147	0.700441	0.740449
Galactonic acid	10348.3	147619	30336.6	19959.3	152274	141247	70049.4	345686	65834.6	292825	386463	367858	7581.47	6791.89	101983
gamma-Aminobutyric acid	27.7933	1.15562	22.2882	28.8256	19.972	1.53985	12.5047	35.6808	4.74401	1.23106	38.6033	66.4873	0.703927	14.4099	16.8798
gamma-Glu-Cys	20.2418	5.80885	17.2821	33.5338	15.7686	24.2016	35.6768	8.31126	29.5418	6.82653	17.4682	22.4572	32.1542	41.7024	10.2445
Glucoheptonic acid	224.817	16.3607	12.2075	34.4853	5.63205	36.6422	3.19411	5.67545	12.3602	5.9068	29.3485	29.8017	10.0719	20.6986	29.6302
Glutathone red	307.145	133.683	213.108	639.649	148.561	231.365	186.443	227.926	652.232	298.103	544.521	140.186	33.0549	190.52	228.449
Glyceric acid	23686.5	23727.4	23302.5	22039.6	22005.9	20484.6	28829.7	29185.7	29734	23813.8	22301.4	22454.5	23914.1	24945.8	23988.6
Glyoxylic acid	215.939	99.8506	10.5968	20.0239	26.5455	65.1338	72.3814	16.167	2.95462	9.36954	13.2655	19.5202	5.2475	41.4085	15.4992
Guanine	28.6532	0.88748	0.963346	21.2251	6.72772	19.9726	50.9559	125.63	29.0782	214.996	56.6127	27.8258	61.2705	19.2806	9.58122
Guanosine	10.1745	21.2191	38.9012	66.7188	10.7572	31.2917	3560.42	213.524	1190.15	2072.97	3381.43	97.4541	40.2868	59.7839	24.5412
Guanosine 3,5-cyclic monophosphate	4.87216	6.53228	10.185	45.3336	20.4869	0.876523	17.8971	20.7416	13.5945	22.6719	12.961	12.9841	12.5181	5.583	2.09179
Guanosine 5-diphosphate	0.709979	0.753122	7.12124	1.67348	14.1252	1.09872	0.838482	0.228983	0.746054	24.1377	15.3712	0.37659	10.9387	14.9447	12.3611
Guanosine 5-triphosphate	148.673	10.7932	25.804	13.9452	5.00184	0.675425	8.105	4.80886	1424.35	265.202	44.6553	33.1306	11.2697	18.1092	17.0048
Homocitrate	120377	97029.5	93044.3	61062.4	64591.3	32931.8	107040	63635	60897.9	49296.7	53418.5	51062.1	103335	100378	100933
Hypoxanthine	256620	202922	199716	196428	190815	190216	2416.58	2930.51	1636.64	5855.71	6832.6	3989.11	1043.76	2136.4	1390.06
Indoline-2-carboxylate	462.749	431.132	361.168	943.912	2069.08	775.23	568.25	464.25	879.377	1413.4	707.247	861.012	303.383	513.496	708.893
Inosine	109.881	667.106	2629.64	9915.53	10548.4	2827.61	20284	20753	19996.2	9551.29	10510.9	11331	10071	9454.92	2445.82
Inosine 5-diphosphate	37.3327	34.8563	65.2522	9.1285	7.24337	40.2674	29.6731	86.1259	44.7211	24.0383	47.5613	57.2151	38.2057	62.9205	32.9471
Inosine 5-monophosphate	22.8999	49.2661	125.548	34.3532	39.1941	122.393	95.505	29.3468	135.132	28.0403	103.121	43.8743	35.5719	217.249	106.797
Inosine 5-triphosphate	485.548	74.7679	107.487	12.0717	15.395	5.24551	6.29027	23.801	2519.65	473.937	97.8823	28.6739	9.55469	16.1943	17.9292
Isopentenyl pyrophosphate	105.925	26.0719	615.319	54.2692	279.52	165.631	147.824	752.006	436.361	96.818	67.247	287.283	109.468	588.543	83.624
Isopentyl acetate	153376	176924	162245	569906	597301	587035	114583	114291	103569	120635	113781	110012	139687	172329	134333
Itaconic acid	153376	176924	162245	569906	597301	587035	114583	114291	103569	120635	113781	110012	139687	172329	134333
Ketoisovaleric acid	166.072	65.3041	156.073	317.536	222.676	71.7385	148.708	87.3163	447.323	423.321	336.531	210.924	62.4421	1866.22	44.2486
Ketovaleric acid	63308.1	6547.44	61539.1	2638.52	79742.7	38335.5	245814	190997	271854	195525	230819	225045	301481	247112	758686
Lactic acid	615421	653955	660264	606804	657873	654545	352492	1.43369e+06	263511	1.86975e+06	1.20571e+06	1.51203e+06	1.48375e+06	779065	1.69269e+06
L-Arabinose	51106.3	52567.5	47582.2	36962.7	28554	47468.2	59154.3	60702.9	56539.5	4647.07	51778.6	32857.1	65550.3	60661.3	70428.8
L-Arabitol	210.198	80.8082	313.776	242.406	111.003	215.575	1532.1	542.398	718.373	2363.04	1704.87	1474.08	545.081	397.03	897.692
L-Arginine	1236.24	1356.92	1257.4	1397.08	1284.01	1426.12	703.871	625.047	884.578	534.521	580.162	920.279	626.883	496.294	751.261
L-asparagine	58.4512	35.0114	206.951	184.159	323.401	250.347	1609.51	158.9	196.121	296.776	189.307	417.383	807.839	733.457	1647.91
L-Aspartic Acid	194847	177130	327261	340104	331229	316316	1.63794e+06	1.67424e+06	1.68625e+06	659625	658002	658635	1.24978e+06	1.18073e+06	1.15823e+06
L-Canavanine	0.672089	0.857263	1.04025	1.06854	2.2637	0.300461		5.47192	0.961464	7.44561	2.07247	18.5504		31.6148	15.2217
L-Carnitine	21.0087	3.20201	21.2496	26.9279	49.1175	11.5089	18.1959	26.0971	38.5892	171.154	27.4075	3.89408	55.4698	41.3521	27.7877
L-Citrulline	392.034	369.221	552.716	284.535	510.095	372.954	186.861	266.947	459.199	165.145	321.195	414.022	300.961	191.951	231.715
L-Cystathionine	6.66368	30.8788	78.0216	2.05637	4.31128	36.8827	25.828	30.2964	31.7712	24.5203	31.5589	22.9421	5.1762	20.7768	11.6139
L-Cystine	1770.57	34854.6	2843.8	2474.57	768.193	1569.31	697.39	4033.33	21246.7	348.378	471.029	716.918	3067.07	2871.49	1555.85
L-Dihydroorotic acid	16.7504	14.9751	79.431	115.497	151.291	30.182	66.8948	365.209	88.1354	237.85	46.0927	316.618	25.1778	441.415	621.598
L-Glutamic acid	2.34257e+06	1.4694e+06	1.39717e+06	1.46026e+06	1.37153e+06	1.39011e+06	4.5052e+06	4.69698e+06	4.54008e+06	4.51737e+06	4.52291e+06	4.5405e+06	4.41839e+06	4.53083e+06	4.2678e+06
L-Glutamine	31736.7	56366.5	59449.9	36013.8	57733.2	61861.2	4029.26	4032.26	4882.6	2160	2768.21	1143.88	9584.74	12085.2	10465.9
L-Gluthathione (oxidized)	39.2566	22.9928	6.15943	173.213	28.8725	15.1928	3056.98	2157.25	2605.24	4821.09	4493.74	4883.22	659.881	170.001	83.704
L-Histidine	2888.06	1699.08	904.152	768.866	1571.74	4216.56	2044.67	1459.34	1024.74	589.885	397.098	197.763	1492.92	645.121	983.074
L-Homocysteine	26.3517	53.3205	106.063	69.9168	53.7106	18.5789	18.0394	16.548	56.4104	15.7164	32.262	33.9835	105.731	59.7042	46.0487
L-Homocystine	75.5125	21.232	9.63817	34.4473	46.1296	16.9288	38.1886	31.9293	10.9464	26.1606	14.848	20.8206	13.4347	18.7588	31.079
L-Homoserine	86.7955	27.1507	183.749	83.0885	36.547	69.0314	115.248	41.9071	115.662	110.391	29.6765	20.1169	13.1756	23.8688	47.5606
L-Hydroxyglutaric acid	731070	722371	703428	1.16402e+06	1.18496e+06	1.15124e+06	958681	948558	960058	1.03665e+06	1.03164e+06	1.03111e+06	803829	801759	776924
Lipoamide	359.385	36.6998	699.072	552.361	39.8611	37.5259	29.2119	461.274	16.3353	23.7337	469.493	21.4022	31.2716	11.8555	11.8041
L-Isoleucine	12422.2	10541.1	14417.6	15716.3	6521.71	10526.9	19333.8	17960.2	20589	21448.8	16650.5	15627.9	18073.1	23176.9	8534.29
L-Kynurenine	13562.3	3842.56	4777.11	3382.18	2308.03	3399.09	3260.08	3720.16	1686.6	1871.48	42192	39529	1741.86	26080.7	2379.91
L-Leucine	12422.2	10541.1	14417.6	15716.3	6521.71	10526.9	19333.8	17960.2	20589	21448.8	16650.5	15627.9	18073.1	23176.9	8534.29
L-Malic acid	9.63356e+06	8.85735e+06	8.54268e+06	9.51973e+06	8.4871e+06	8.21885e+06	2.66575e+07	2.62952e+07	2.66691e+07	2.64539e+07	2.57869e+07	2.55458e+07	1.77766e+07	1.73352e+07	1.70761e+07
L-Methionine	615033	493480	486647	521642	492664	461802	592718	599930	608538	590567	596476	617012	590774	580989	567449
L-Phenylalanine	1.14855e+07	1.96352e+07	1.0522e+07	1.96792e+07	1.71492e+06	1.06054e+07	9.09628e+06	9.09729e+06	9.34654e+06	8.27758e+06	7.9948e+06	8.07001e+06	7.44279e+06	7.45293e+06	7.23422e+06
L-Proline	27.2012	8.92064	25.374	9.4334	67.9548	18.9519	96.3739	271.018	55.333	91.3382	84.0077	245.674	12.7061	26.8703	75.6451
L-Serine	8617.19	7978.05	60952.6	11650.6	24457.5	9055.31	1338.28	624.591	279.306	194.012	197.757	24.8119	676.632	722.509	835.648
L-Sorbose	137157	86833.1	254600	66301.2	76231.6	216140	132790	418663	97910.7	424414	359584	410542	105394	490130	141797
L-Threonine	23359.3	35042.6	37501.8	630936	404602	769770	521929	435426	545953	13550	316046	8736.53	541322	531356	556693
L-Tryptophan	317882	208408	311412	394826	314201	336460	163587	217899	208104	175674	163296	99578.3	203188	221042	119762
L-Tyrosine	1.29989e+06	311700	312350	781141	882633	335016	719754	750876	1.7812e+06	798819	1.97981e+06	2.01167e+06	1.36698e+06	1.33184e+06	621223
Maleic acid	16649.9	16349	10368.8	71062	46684.4	59263	12501.2	20047.2	14018.3	19902.2	12050.6	14334.6	13081.7	35176.4	12417.4
Malonic acid	333658	311164	307916	344415	335558	290702	442743	440817	445766	402224	389663	394266	370476	377365	354856
Melibiose	7724.2	9008	6093.79	12472.9	11202	12030	8720.82	8846.89	8812.17	4456.89	4307.55	9352.16	11505.4	12044.2	9304.45
Mevalonic acid	650.746	81.5899	158.506	553.682	974.584	719.839	180.145	290.802	466.538	372.107	335.279	745.829	705.522	439.669	416.583
Mevalonic acid 5-phosphate	1014.16	116.175	235.177	21.907	33.5103	109.186	67.3398	47.9238	198.239	94.4546	111.323	212.069	350.653	281.591	143.768
m-Hydroxybenzoic acid	16606.2	10695.8	14012.7	15465.7	15260.8	14679.3	3469.41	2088.64	3063.77	493.96	3424.09	1888.45	2685.35	2469.19	2894.89
myo-Inositol	2.98568e+06	1.48668e+06	3.33803e+06	3.25757e+06	3.60071e+06	3.60585e+06	2.53915e+06	2.4754e+06	2.56752e+06	2.49399e+06	2.71402e+06	2.82083e+06	3.36996e+06	3.65556e+06	3.51471e+06
N-Acetyl D-galactosamine	25.6103	11.5409	66.0158	9.50166	60.7996	29.3049	26.1884	91.3057	345.624	50.7168	365.519	321.539	47.8656	36.8801	66.9559
N-Acetyl-alpha-D-glucosamine 1-phosphate	5481.35	1019.46	7088.89	3130.48	5034.79	3469.74	1408.96	2768.3	1410.99	2226.73	493.01	3485.3	3878.04	2877.94	2485.05
N-acetylaspartate	43064	43987.1	42146.6	43912.6	38573.2	36618.9	133005	131294	134371	220788	214483	212730	119765	115887	114230
N-acetylaspartylglutamate	452.159	1632.12	2646.22	168.408	832.056	2920.72	2576.27	1412.93	3349.28	2668.33	2243.54	2742.91	1932.09	1057.36	1512.04
N-Acetyl-D-glucosamine 6-phosphate	113.094	230.576	563.134	319.928	86.9397	323.339	515.156	480.584	320.514	409.696	4136.21	593.894	393.779	368.493	3519.46
N-Acetylglutamic acid	2398.87	5370.75	4986.07	4954.95	5621.91	4982.19	24249.3	22807.9	23794.3	19935.5	37995	37297.7	17225.6	9095	15427.3
N-Acetylneuraminic acid	57210.7	59783.2	30943.2	61959.5	30484.8	30341.9	70005.8	30750.1	67772.3	25431.4	29564.5	21039.8	28220.7	27423.8	31345.2
N-Carbamoyl-DL-aspartic acid	5033.57	2707.2	2176.1	2046.26	4432.26	2202.82	57741.8	56841.9	58282	60102.7	55867.7	55376.6	34396.5	33060.2	31141.2
N-Carbamyl-L-glutamic acid	3832.99	3853.51	3887.93	2492.1	4154.63	1806.98	14508.6	11891.9	13137.2	12031.9	12373.4	11713.9	8201.17	9159.35	8147.33
N-Formyl-L-Tyrosine	188.735	192.342	694.666	39.9254	26.2786	95.1143	132.466	179.349	45.3636	235.402	177.889	330.452	158.125	266.175	149.64
Nicotinic acid	4353.3	800.349	568.372	3270.54	762.401	3727.12	829.498	975.808	119.314	110.608	142.83	64.8222	2671.32	3849.46	1033.18
Nicotinic acid mononucleotide	192.874	25.6783	46.7648	34.3031	51.5243	55.2852	101.425	14.0065	81.1129	30.5804	79.5599	15.2192	24.1814	70.8103	10.1322
o-Hydroxy hippuric acid	27560.2	31228.1	31745.5	28312.7	21570.3	42650.3	11278.6	14208	16802.4	13812.9	13186.3	9060.23	13106.8	9626.82	12750.2
o-Phospho-L-Serine	16.6355	12.7494	6.78225	12.6908	13.6492	9.41164	9.48566	17.973	6.27645	10.4014	16.0658	6.59603	11.8236	7.81496	4.62253
O-Phosphorylethanolamine	19.431	37.4189	15.2733	33.8348	10.6563	47.6548	81.4675	40.8853	131.489	237.729	274.847	26.5756	127.864	108.093	14.2807
Orotic acid	271.69	153.697	178.703	47.0747	77.151	64.8768	18650.8	1150.29	736.616	16074	11370.6	4272.61	5705.48	2616.28	3535.72
O-Succinyl-L-homoserine	602.116	2704.57	569.39	828.282	1584.5	715.027	810.141	1158.73	917.325	383.592	1419.58	1137.25	829.734	614.141	869.421
Oxamic acid	0.569904	15.8318	11.3746	17.4868	10.4456	10.5196	66.1167	46.7588	66.261	61.5979	2.35749	2.70343	55.5999	24.9355	16.0956
Phenylpyruvic acid	18502.3	21544	20693.7	24770.5	35337.8	37407.9	79347.8	82937.6	85505.1	87487.8	94257.5	104053	35504.9	34031.6	32758.8
Phosphoenolpyruvic acid	64.7303	152.345	75.5954	89.9578	91.8024	79.6021	218.741	169.986	74.641	114.003	79.7998	44.6952	94.815	118.938	70.6654
Prephenic acid	80.2848	39.8568	84.6203	130.727	73.8188	94.4227	106.062	101.075	20.8981	23.3035	27.9584	40.2929	91.2918	50.8316	60.0639
Pyridoxal 5 phosphate	22.6125	15.4606	21.551	20.8673	8.46215	38.1414	19.289	27.4935	7.93929	14.4209	26.2966	12.2189	28.6985	37.179	32.0489
Pyridoxal hydrochloride	72888.6	58781.5	60151.8	62302.4	56807.5	53486.7	157621	174695	198089	263105	309199	312867	92050.3	87727.9	91316
Pyridoxamine	45.5674	4.54436	13.9747	21.8516	18.9176	19.9189	26.9549	12.8884	18.5769	44.7569	15.0659	88.0754	14.8238	20.8844	39.1159
Pyridoxine	3.94192e+06	3.19922e+06	3.16082e+06	3.45192e+06	3.16306e+06	3.05446e+06	4.47082e+06	4.50718e+06	4.53545e+06	3.89552e+06	3.79358e+06	3.67618e+06	3.45414e+06	3.44021e+06	3.34189e+06
Pyruvic acid	25270.2	25007.4	23399.5	6.02198e+06	2.40797e+06	5.29678e+06	2.59619e+06	2.88382e+06	2.87164e+06	2.1713e+06	2.12478e+06	2.08618e+06	3.08214e+06	2.75666e+06	3.07004e+06
Quinic acid	6.9504	30.284	2.94893	18.3154	16.4546	23.726	16.8712	11.4298	21.4482	52.2408	12.6007	6.94088	5.6492	2.82389	9.82692
Remove	7.26166	1.47083	25.9148	10.2283	11.0856	1.51109	6.6242	3.59141	10.0609	13.7826	13.0054	9.09645	17.1098	7.94139	6.52078
Riboflavin	172011	100704	106819	89815.4	72770.4	184450	90328.8	109482	103001	58701.3	71661.5	55265.2	70478	70853.7	146061
Ribonic acid gamma lactone	61.7812	19.2482	73.523	19.938	41.9045	84.7912	148.148	62.6914	15.4872	43.8269	101.567	50.802	33.2278	44.2179	39.1487
S-2-Aminoethyl-L-cysteine	1.16137	0.740027	21.7154	13.8505	38.9092	0.797577	0.458812	0.934533	1.32365	3.04213	0.401808	3.75648	0.763839	0.681545	0.431769
S-5-Adenosyl-L-homocysteine	20.6918	2.60037	14.3011	20.587	17.1643	4.20625	153.482	21.1615	283.389	40.8358	191.812	1641.61	135.729	78.0115	228.702
Salicylic acid	20701.5	25955.8	19857.4	13903.9	27739	9329.65	13364.4	14196.5	16572	12966.2	17854.5	13879.9	16480	18457.8	11278.5
Shikimic acid	121.227	15.9299	30.512	12.8446	39.3164	24.9922	19.7972	19.0354	28.6514	27.756	38.4718	25.295	47.5526	18.668	26.1695
Succinic acid	1.74777e+07	1.73563e+07	1.70707e+07	1.75288e+07	1.68128e+07	1.64727e+07	2.01548e+07	1.99266e+07	2.00481e+07	1.85493e+07	7.08081e+06	1.79329e+07	1.82198e+07	1.80601e+07	1.76224e+07
Succinic semialdehyde	8.53048	36.6589	13.8895	8.03567	206.695	21.0108	7.34956	28.9209	13.3041	12.9375	21.5112	2.35144	22.1029	9.71348	20.3818
Taurine	2613.06	1771.08	1835.6	2194.66	2637.16	487.759	74.054	166.215	198.28	28.4404	46.8914	13.1772	748.764	466.573	524.204
Taurocholic acid	61197.3	59322.8	59575.8	65562.7	55519.2	53831	63439.6	60994.1	63065.3	45473.7	43494.4	43152.5	45998.9	43779.5	43261.5
Thiamine	53.8221	48.3169	50.5478	181.016	26.9965	95.5778	281.005	547.103	2887.7	724.422	1549.62	789.562	118.364	226.847	344.806
Thymidine	6402.7	6317.51	3747.07	4008.42	2927.87	9192.39	43453.4	37149.6	38089.6	51005.2	27395.1	28247.2	12537.6	14083.8	13790.2
Thymidine 5-diphosphate	46.4964	207.423	135.074	21.4187	18.1311	23.2124	186.135	534.838	418.496	136.996	518.966	443.592	95.5818	446.841	210.194
Thymine	379.466	48.5381	349.919	852.196	156.608	56.2496	5.16792	26.5786	63.5814	22.9623	20.3216	14.5313	23.4351	22.9191	18.9388
trans-4-Hydroxy-L-proline	79.3974	155.43	103.389	230.582	161.008	370.798	1256.03	224.57	204.788	271.188	245.483	3056.81	222.935	295.702	331.813
trans-Aconitic acid	553693	463116	421260	427405	361771	363177	8.66905e+06	8.39528e+06	8.704e+06	1.03165e+07	9.99118e+06	4.56383e+06	2.60622e+06	2.52293e+06	2.44931e+06
trans-trans Muconic acid	41.5276	49.6968	11.2381	41.5648	16.7065	39.0001	29.6455	12.2633	30.4905	30.2618	31.705	27.4826	34.6233	26.5003	27.8007
Trehalose	238.36	403.197	108.206	97.682	260.326	305.126	1271.41	501.939	335.123	2007.66	1127.62	1840.62	2187.39	1682.61	1132.18
Trehalose 6-phosphate	24.2492	11.2514	11.2896	9.74296	11.977	16.7592	71.912	82.0006	30.4467	87.87	49.6178	37.4973	27.8007	7.97835	69.3351
Uracil	15196.8	25356.9	23766.9	16268.6	25861.1	10421.5	7813.2	6877.83	7521.63	65.228	30.4708	7214.91	2925.98	196.725	1697.54
Uric acid	315951	412519	511748	1.38087e+06	747483	683107	2.71137e+06	2.64403e+06	2.76301e+06	764101	829548	795829	695366	101439	507977
Uridine	76211.5	130967	78915.3	83383.9	73406.4	124814	27761.2	40749.9	17071.7	25435.6	20720.9	31406.3	11081.9	14457.8	13088.9
Uridine 5′-diphosphogalactose	299.987	246.584	261.238	669.437	257.734	465.668	937.913	193.2	285.123	418.097	215.432	334.85	3455.71	347.274	582.41
Uridine 5-diphosphate	32.0793	11.6014	15.0002	31.8795	17.7968	18.8182	29.8607	23.4594	38.9602	20.1707	12.8433	28.3268	57.9521	15.4087	15.5551
Uridine 5-diphosphoglucose	299.987	246.584	261.238	669.437	257.734	465.668	937.913	193.2	285.123	418.097	215.432	334.85	3455.71	347.274	582.41
Uridine 5-monophosphate	141.424	200.813	389.223	525.841	117.553	293.099	58.628	275.674	424.821	208.496	32.1219	31.7416	120.793	110.05	89.1145
Uridine 5-triphosphate	1898.87	399.677	65.2933	31.6113	15.3877	12.1674	19.2695	75.7641	36198.7	2618.59	75.9993	172.916	31.6286	44.6354	50.9272
Vanillic acid	105.229	207.182	58.9192	55.5951	75.1406	58.2993	107.898	68.1725	75.3041	124.433	57.869	59.907	249.57	218.225	327.353
Xanthine	897702	806859	794949	812170	818529	354066	1.78931e+06	1.85597e+06	1.88222e+06	2.04352e+06	2.0322e+06	2.0435e+06	1.65144e+06	907880	819370
Xanthosine	40707.4	34553.8	36672.7	12792.8	44200.3	44673.1	114195	43260.3	42931.7	54696.9	12320.9	38644.7	81870.6	49867	81696.7
Xylitol	210.198	80.8082	332.275	242.406	111.003	215.575	1532.1	542.398	718.373	2363.04	445.833	1474.08	606.537	397.03	897.692
