# Supplementary figures and images for: Metabolic requirement for GOT2 in pancreatic cancer depends on environmental context
Source: eLife journal article supplement (doi:10.7554/elife.73245), 2022-07-11

**Figure 1B**

Blot1-GOT2


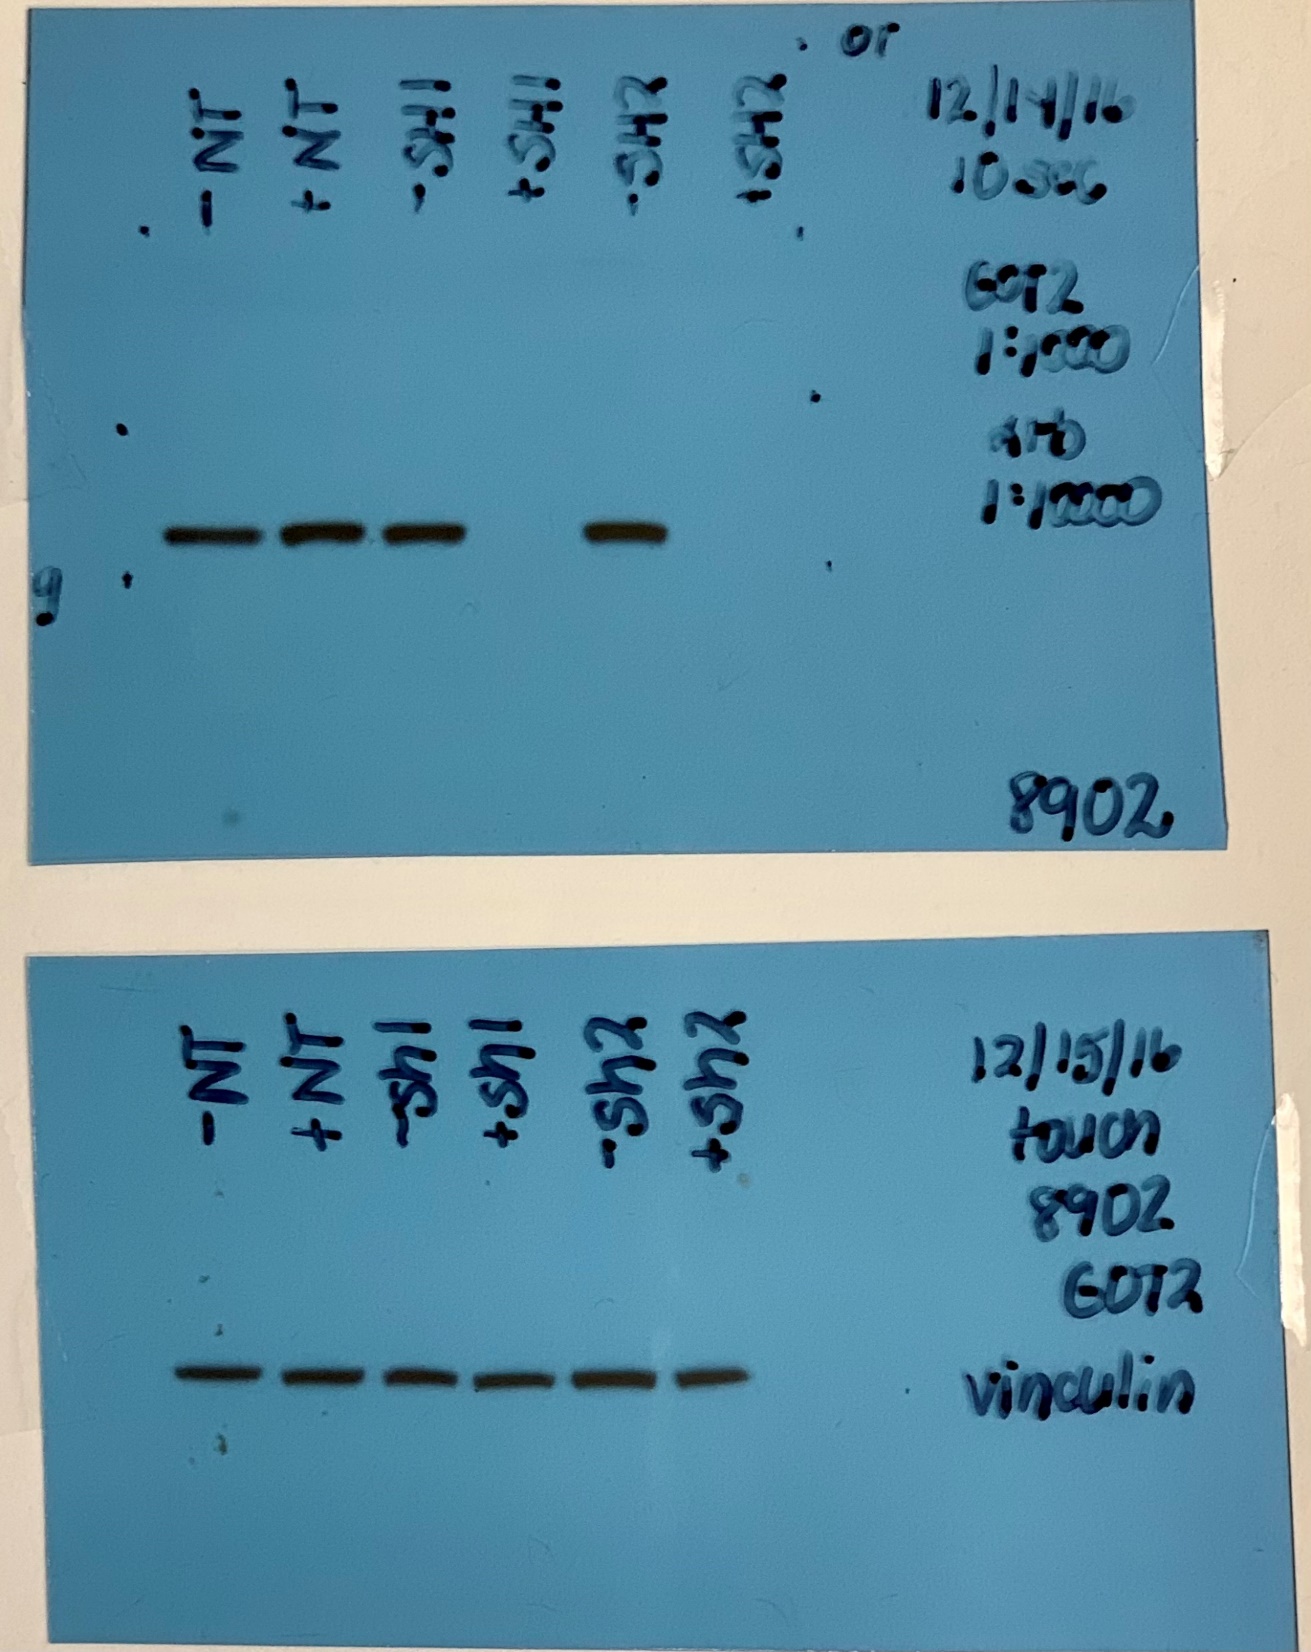


Blot2-Vinculin loading control


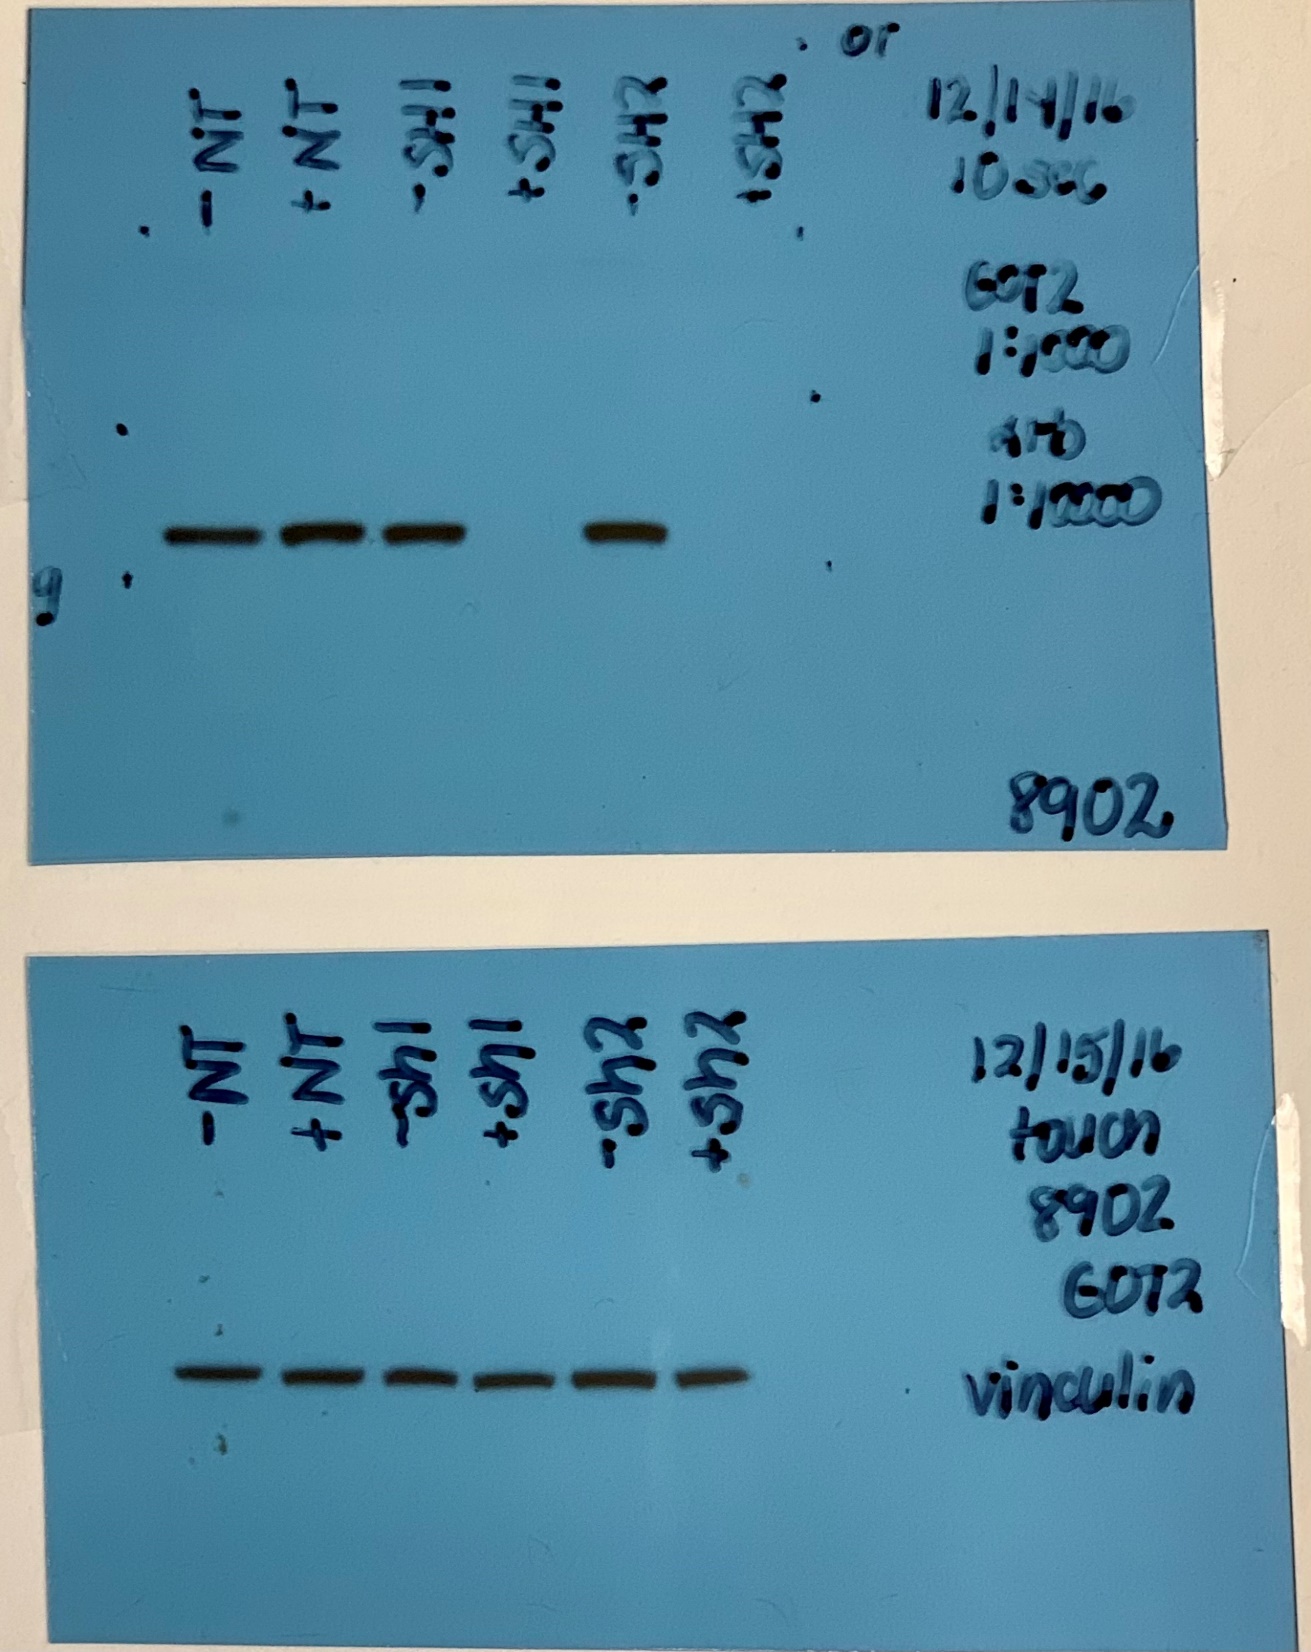

Supplement: supp [file Figure 1-source data 1.docx]

**Figure 2-figure supplement 1D**


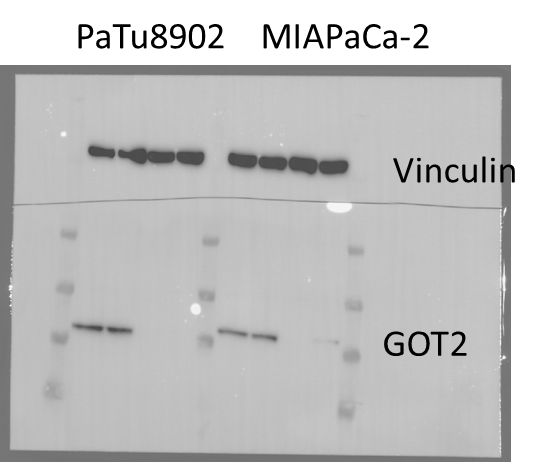

Supplement: supp [file Figure 2-figure supplement 1-source data 1.docx]

**Figure 2-figure supplement 2A**


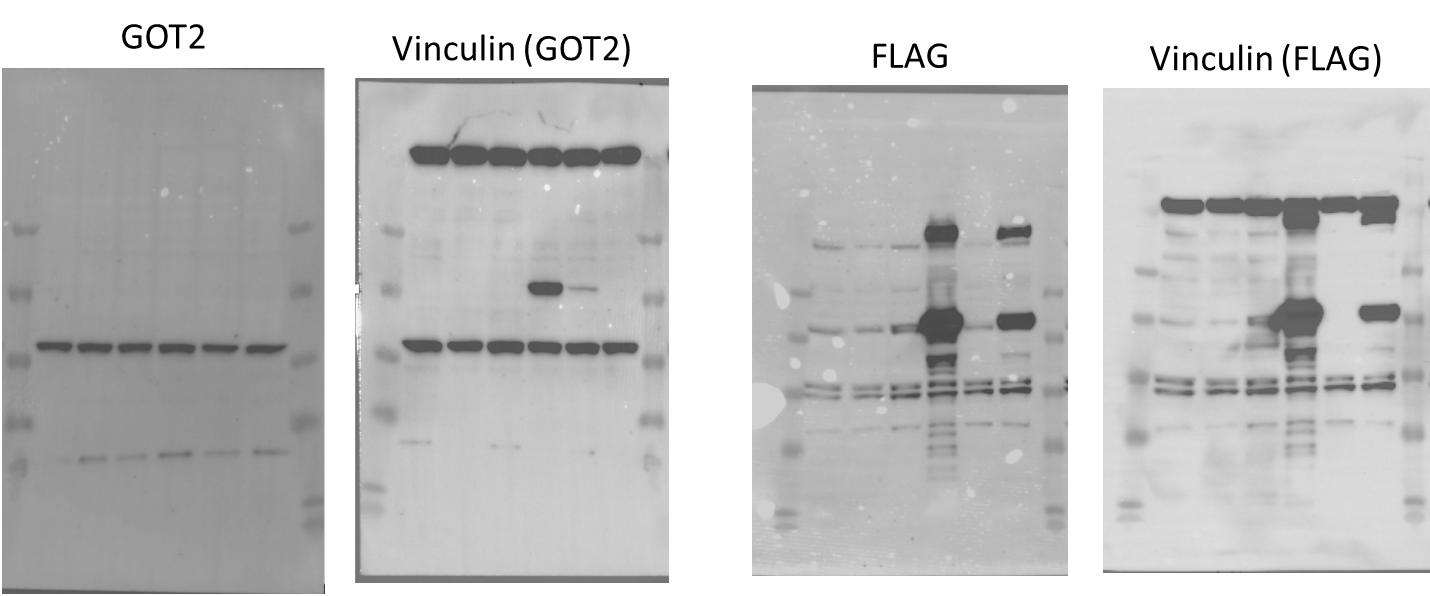
PaTu-8902 shNT


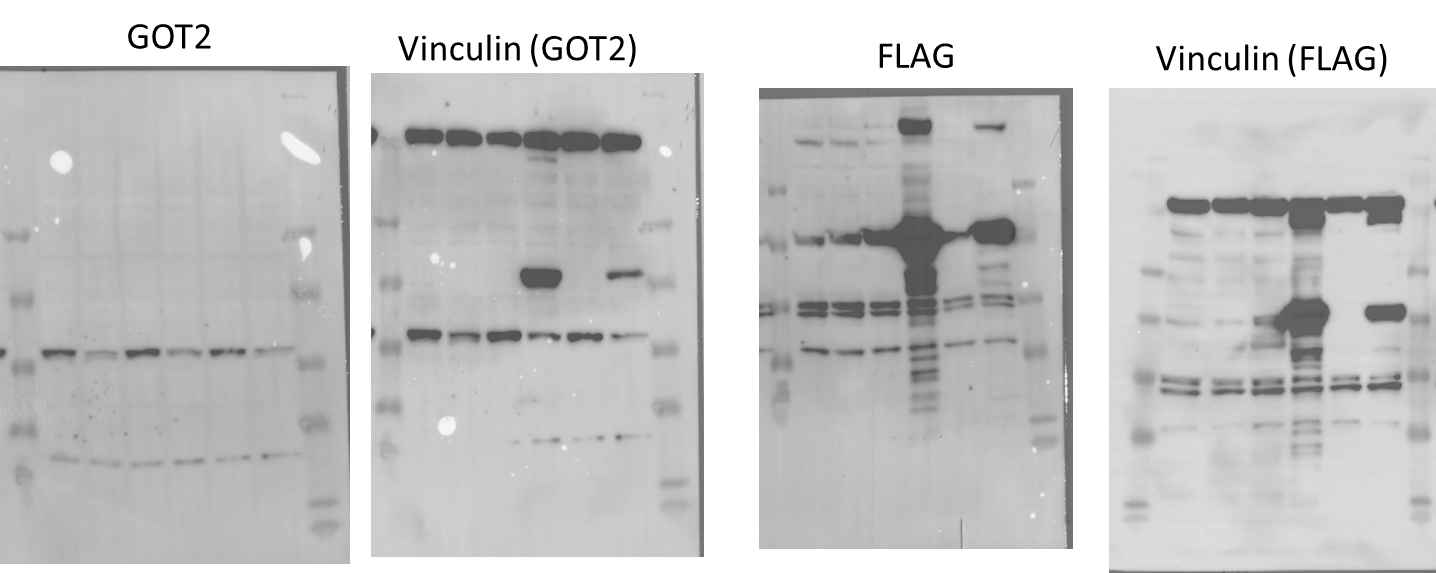
PaTu-8902 shGOT2.1

MIAPaCa-2 shNT & shGOT2.1


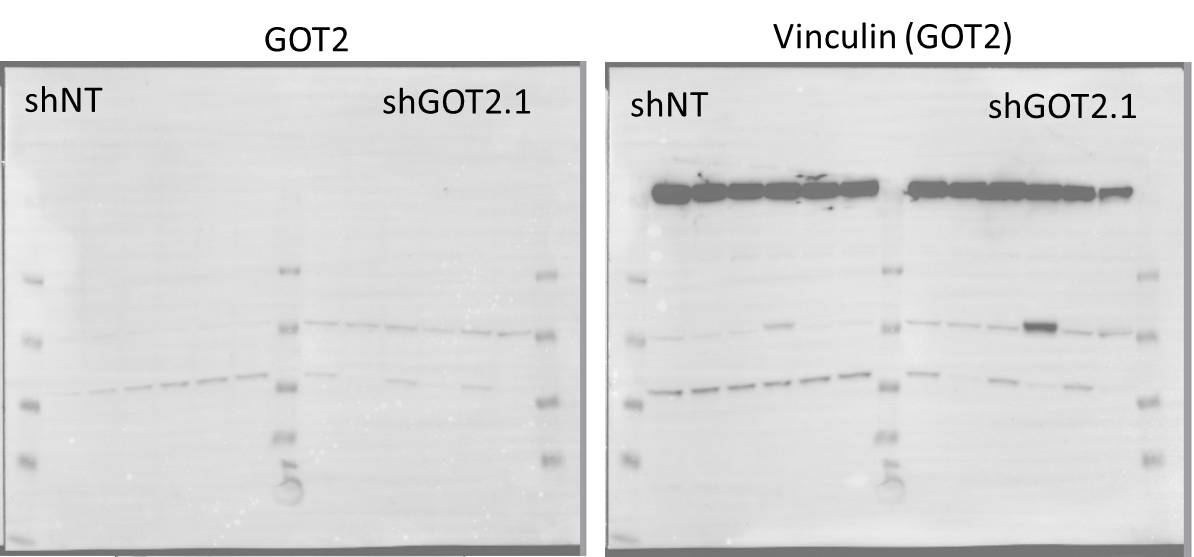

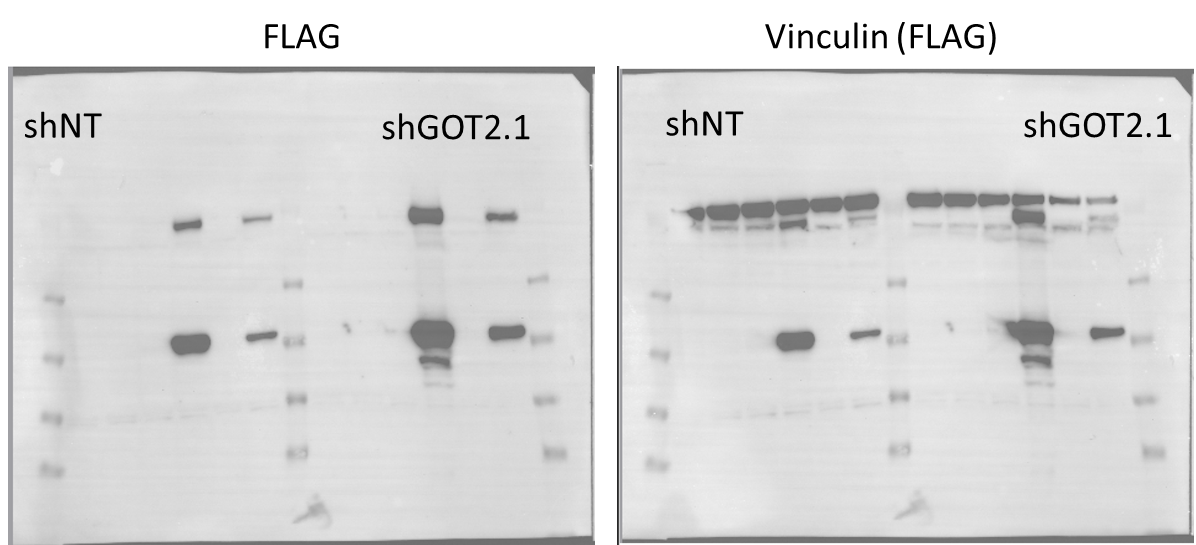

Supplement: supp [file Figure 2-figure supplement 2-source data 1.docx]

**Figure 6-figure supplement 1B**


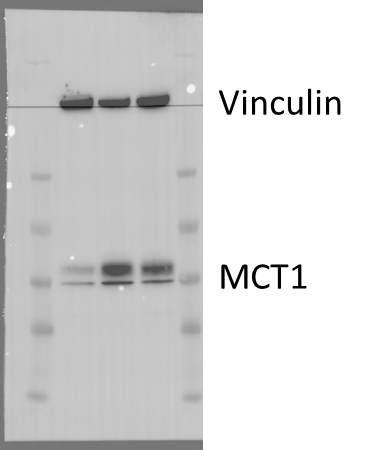


**Figure 6-figure supplement 1D & 1F**

**
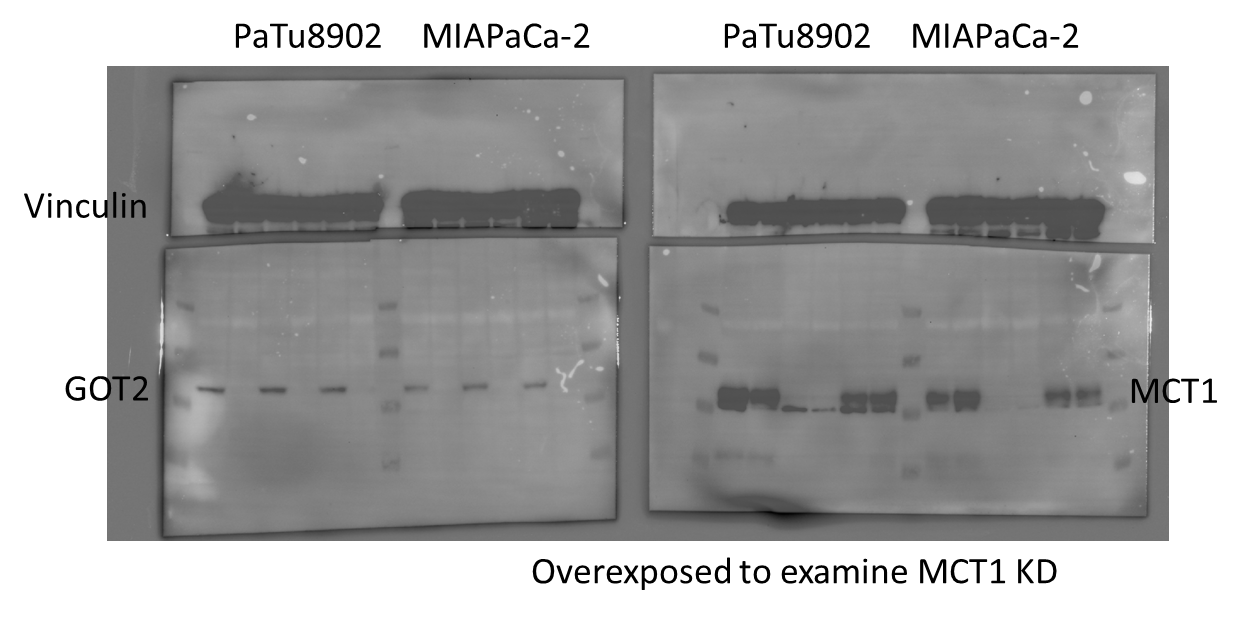
**

**Figure 6-figure supplement 1J**


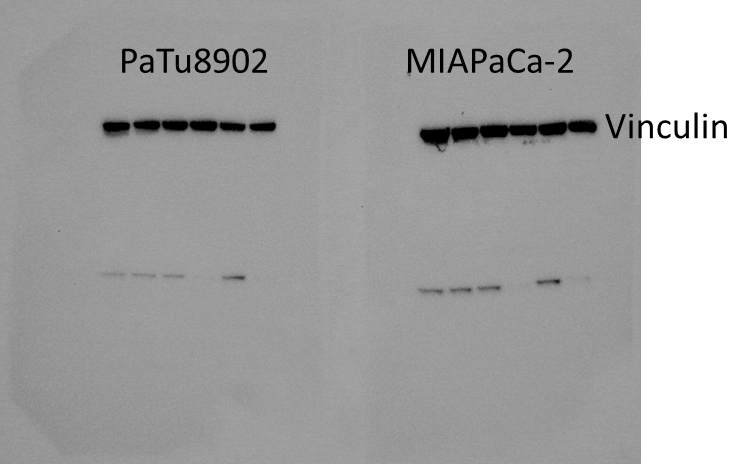


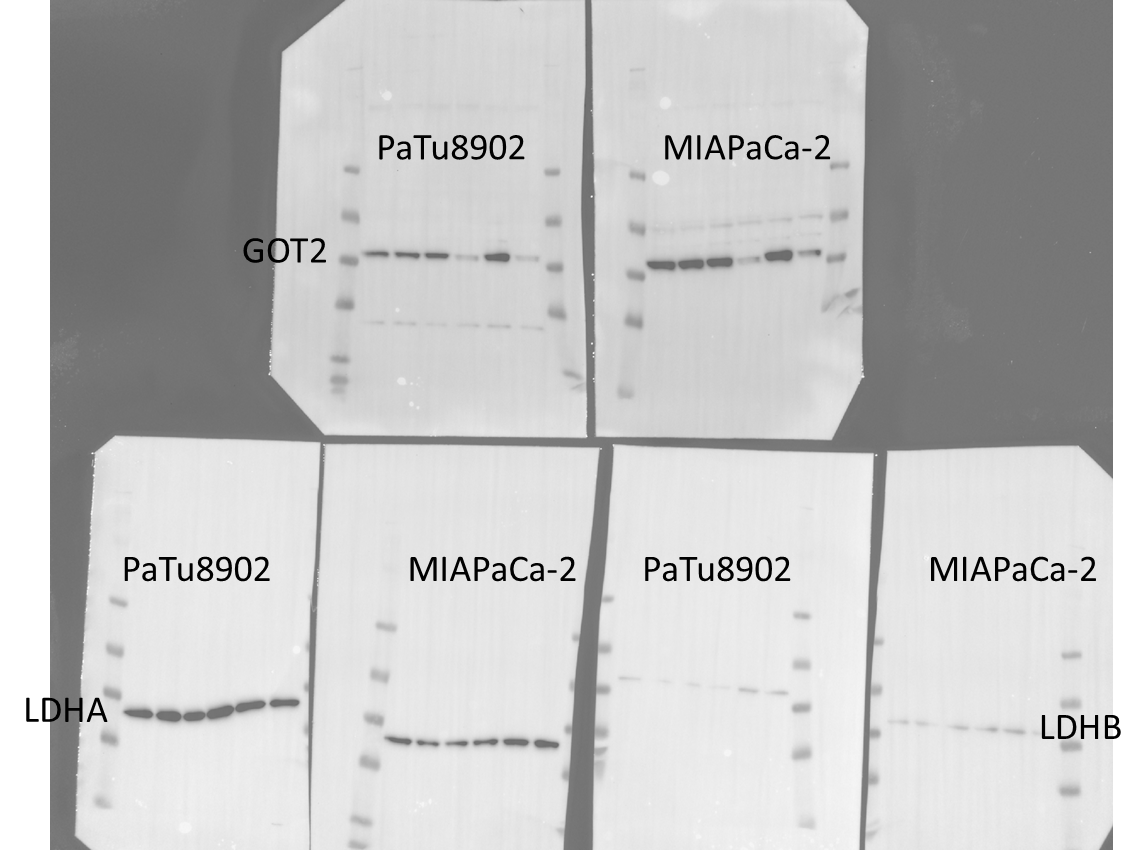

Supplement: supp [file Figure 6-figure supplement 1-source data 1.docx]

**Figure 6E**

Blot1-GOT2, MCT1, Vinculin loading control


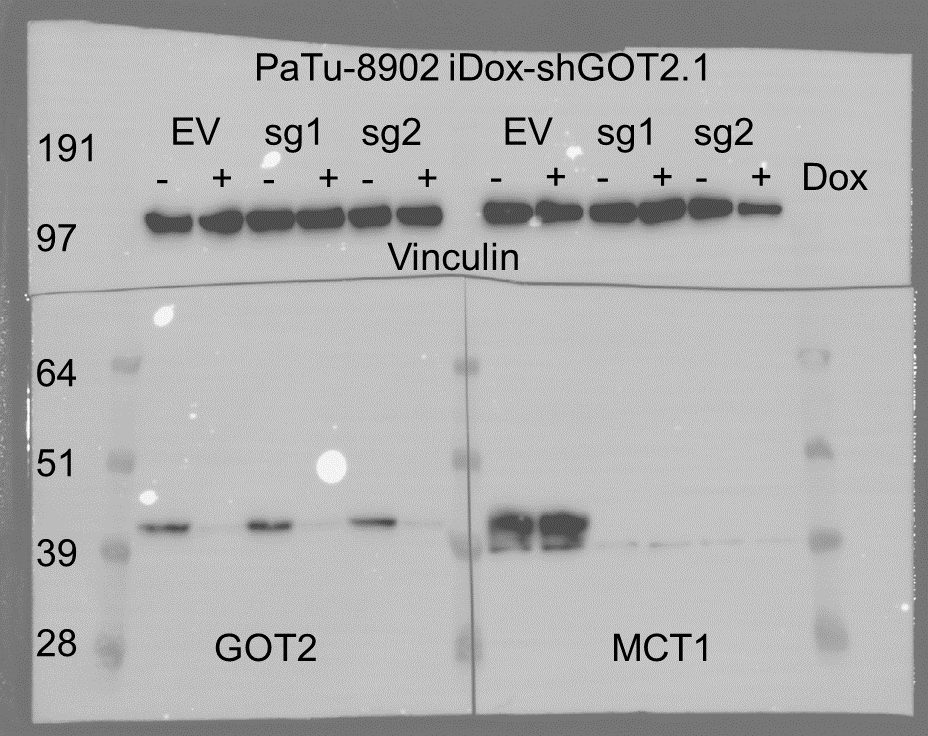

Supplement: supp [file Figure 6-source data 1.docx]
